# Supplementary material for: The aryl hydrocarbon receptor controls mesenchymal stromal cell-mediated immunomodulation via ubiquitination of eukaryotic elongation factor-2 kinase
Source: PubMed Central journal article supplement (PMC10710493; doi:10.1038/s41419-023-06341-7), 2023-12-09

Fig. 3D

Protein marker

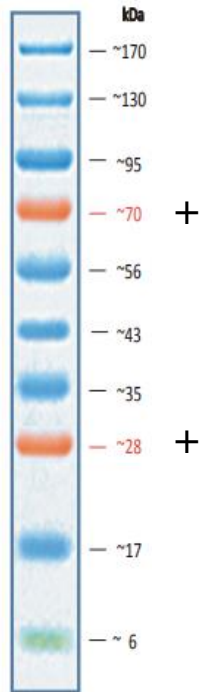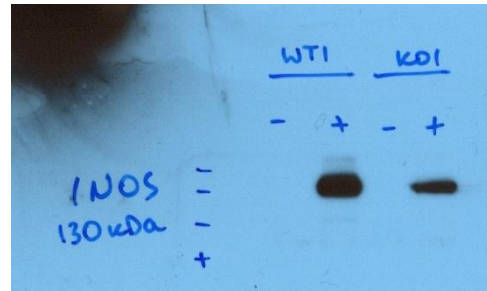

← iNOS (130 kD)

Short exposure

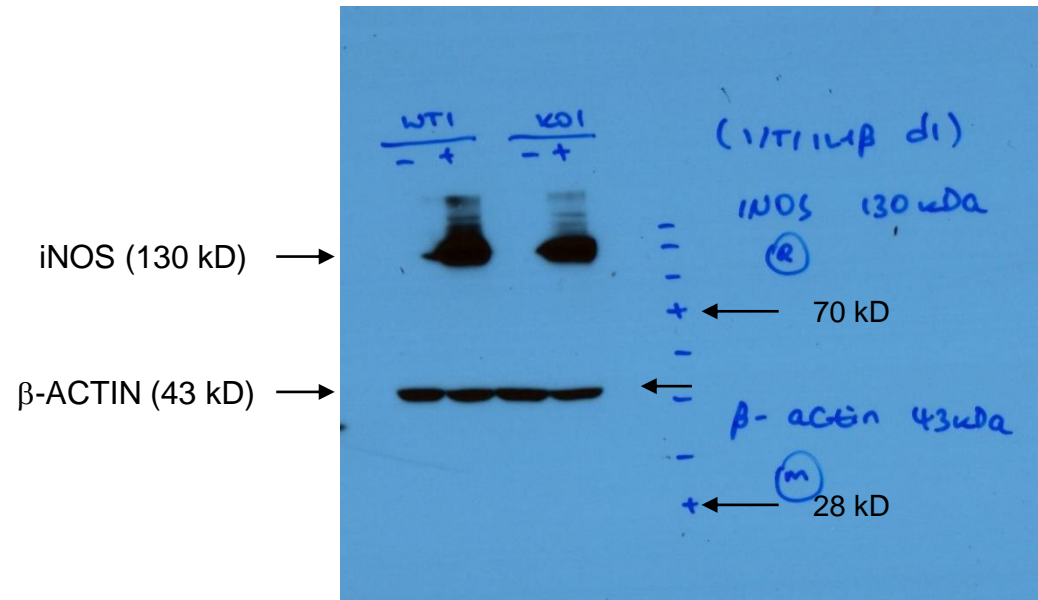

iNOS (130 kD) →

β-ACTIN (43 kD) →

Long exposure

Fig. 3E

Protein marker

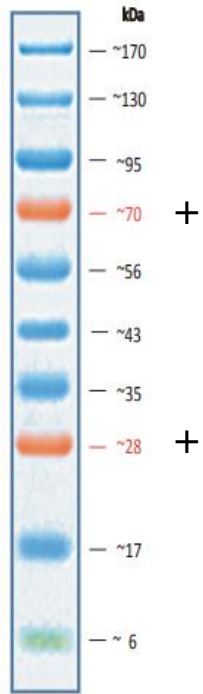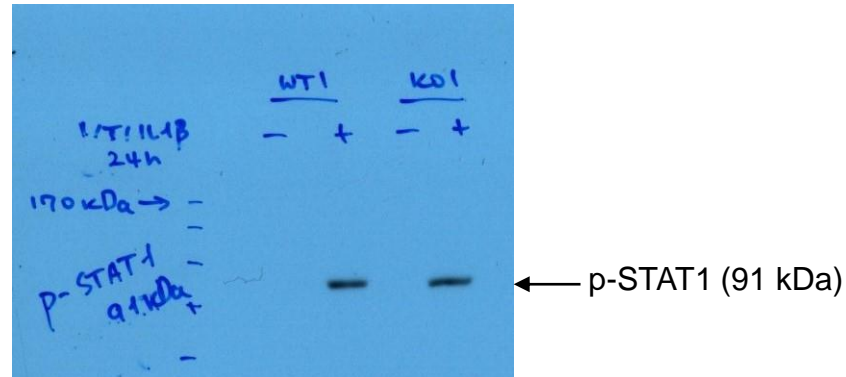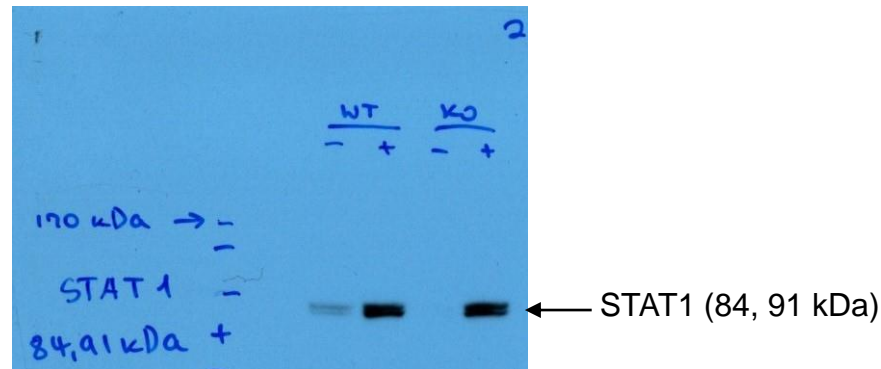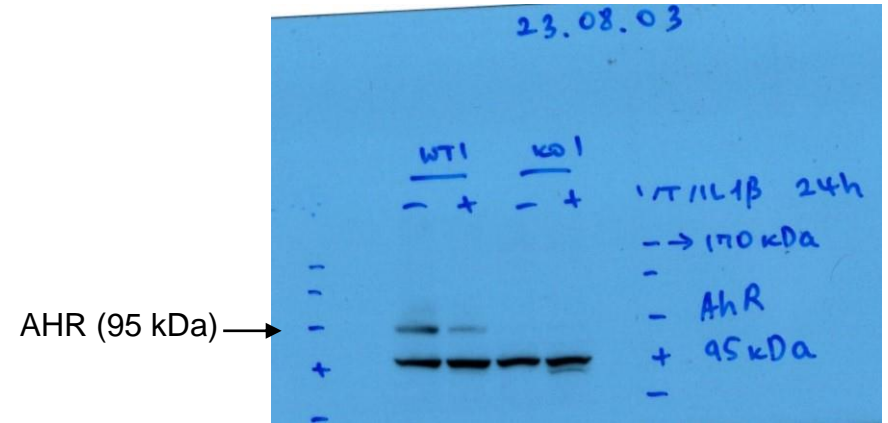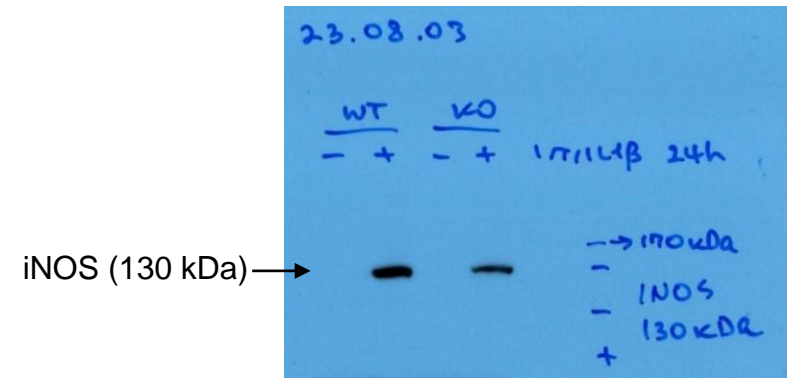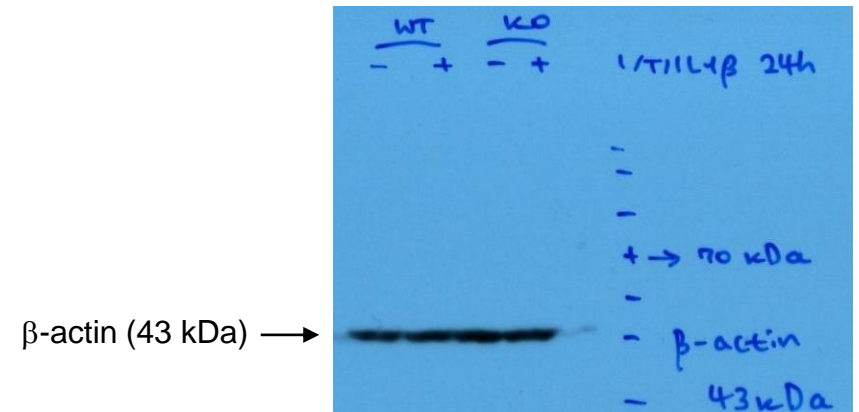

**Fig. 4A**

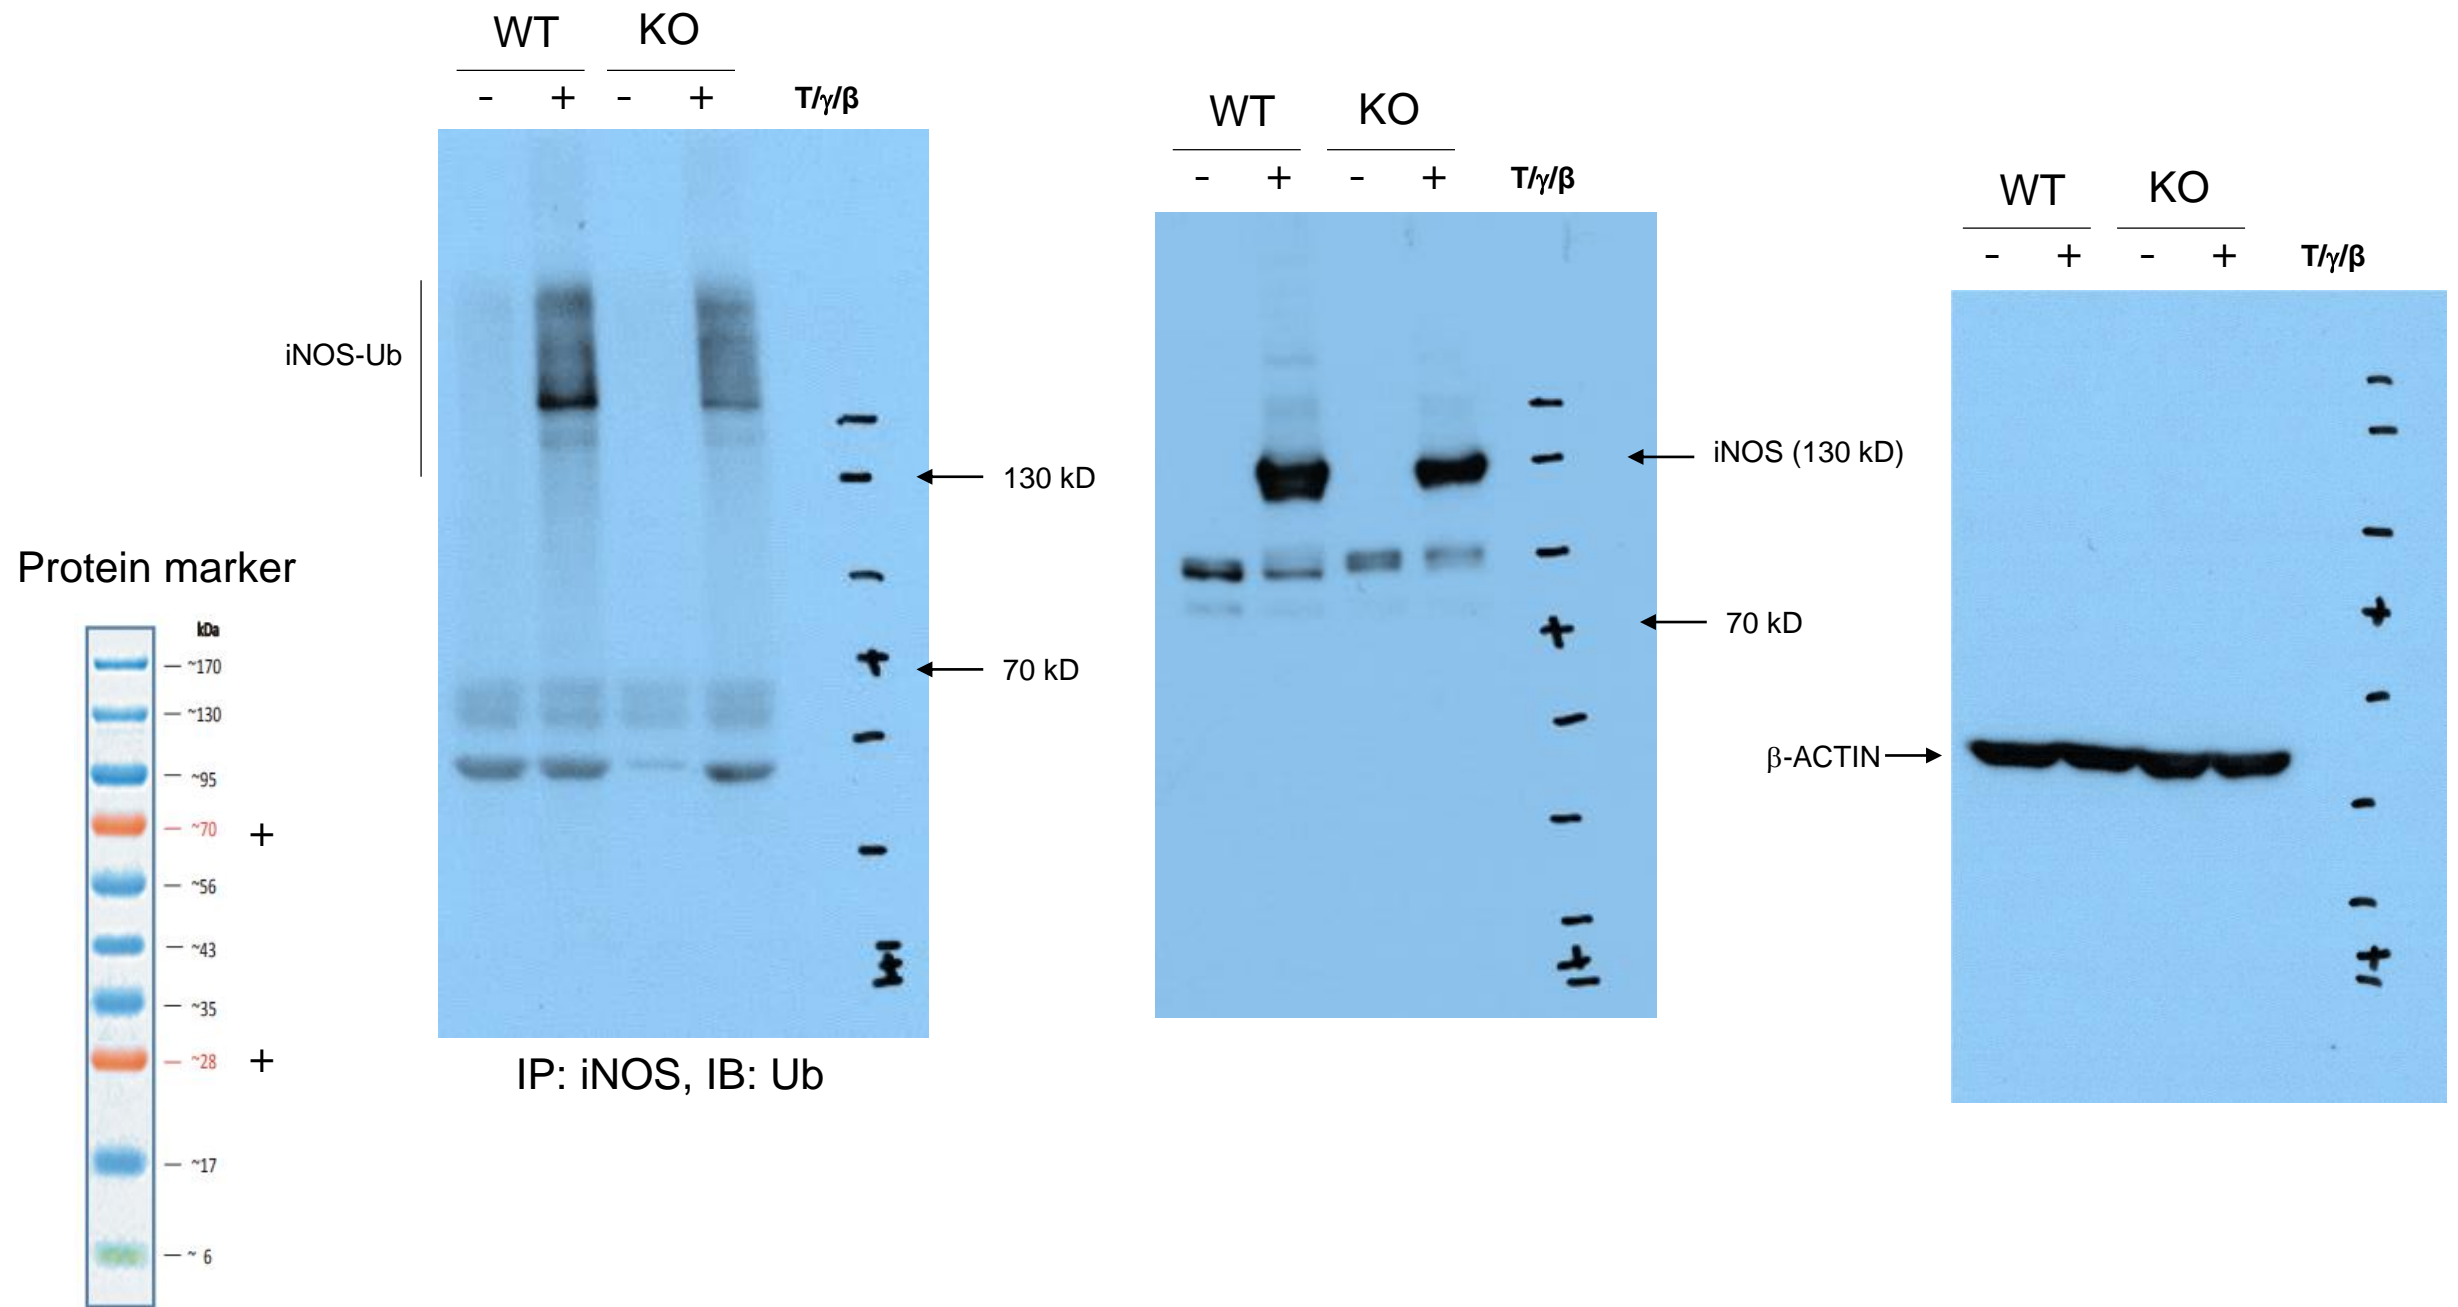

**Fig. 4B**

Protein marker

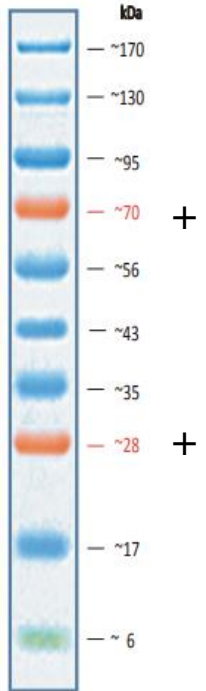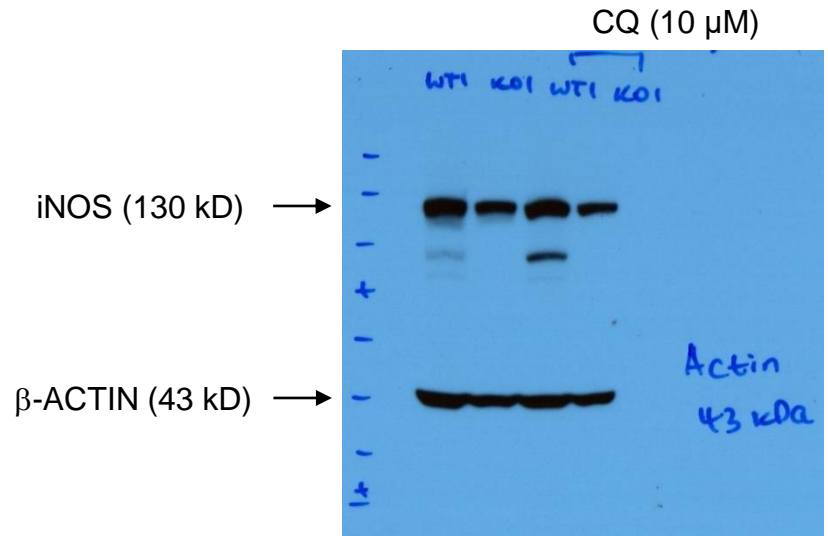

Fig. 4D

Protein marker

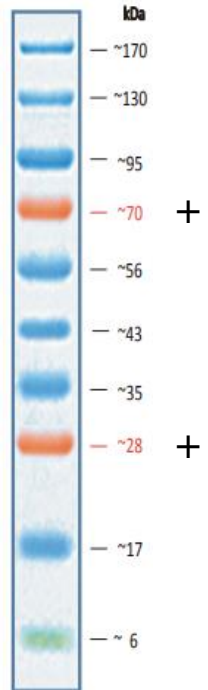

iNOS (130 kDa) →

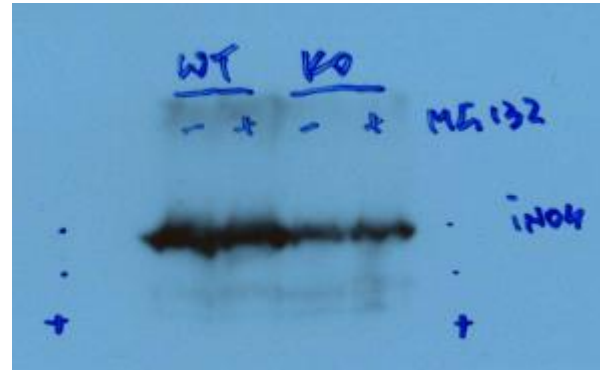

β-actin (43 kDa) →

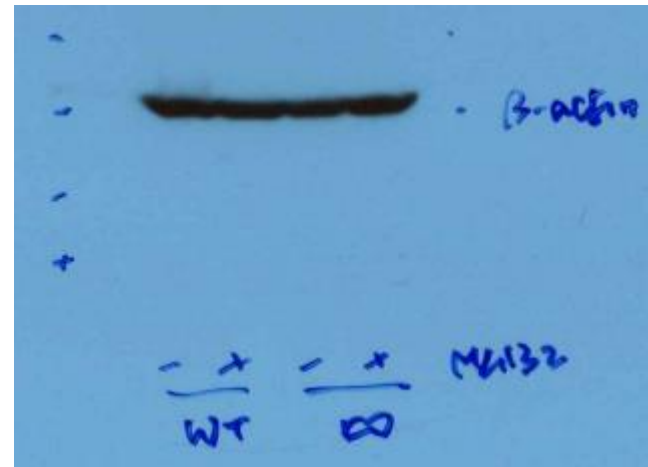

Fig. 5A

Protein marker

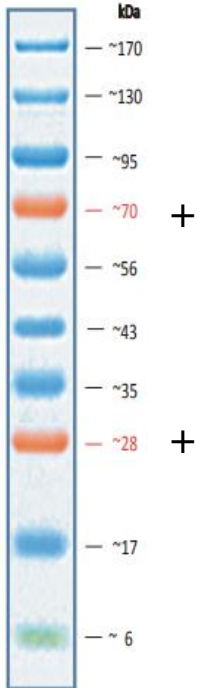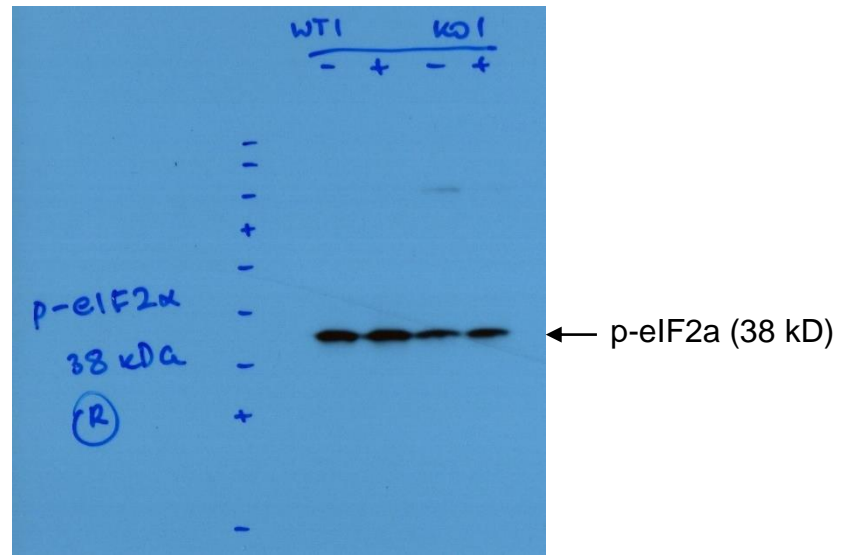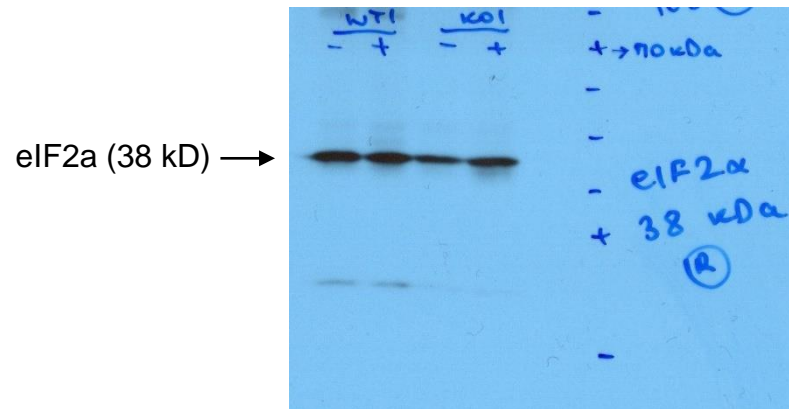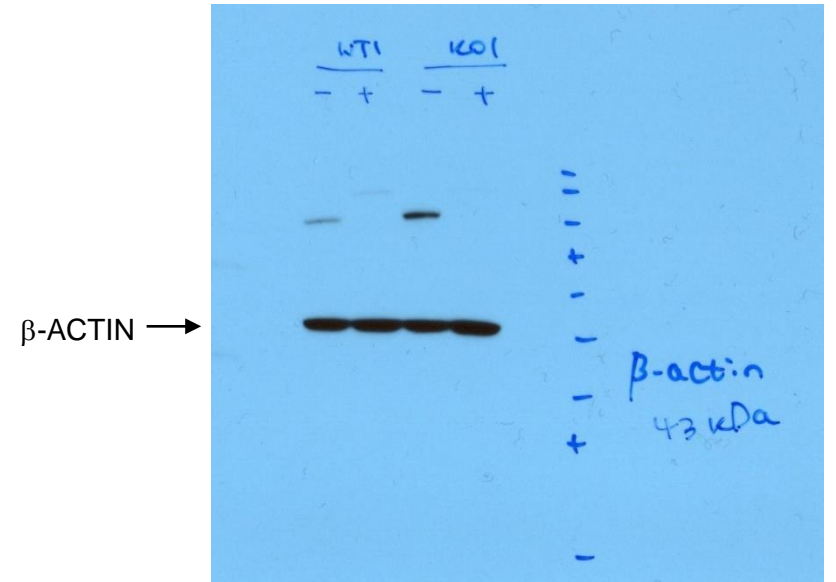

Fig. 5B

Protein marker

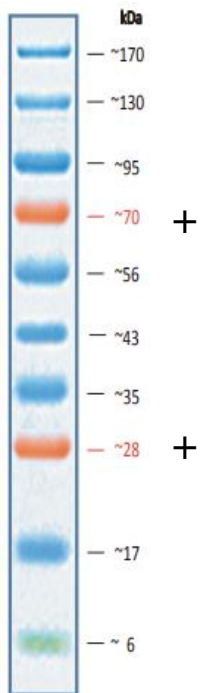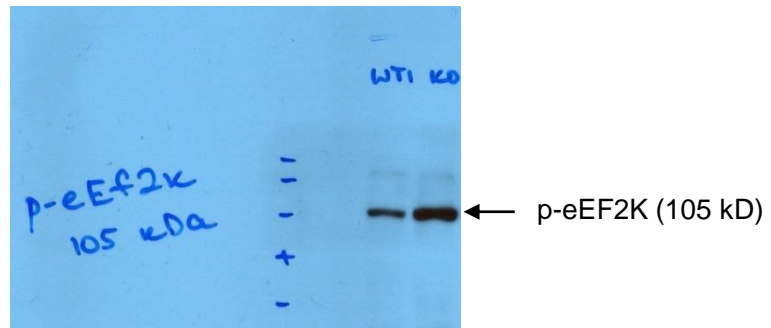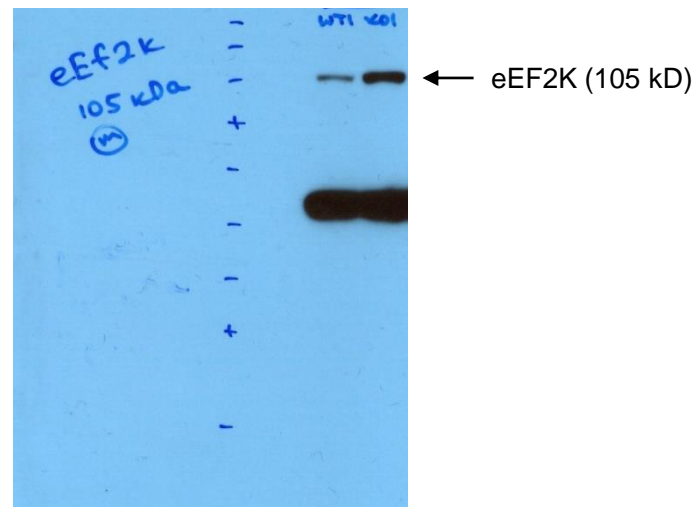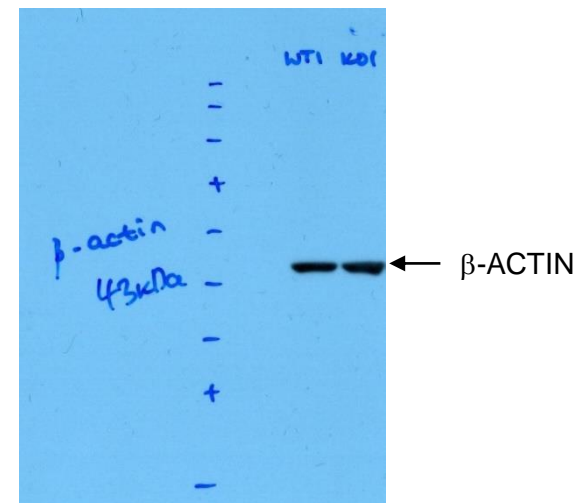

Fig. 5D

Protein marker

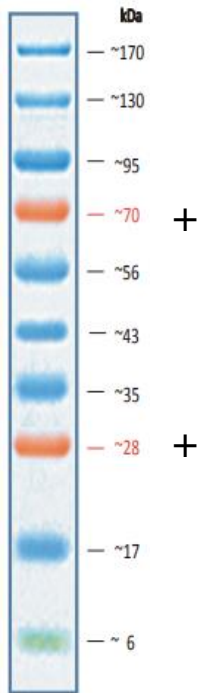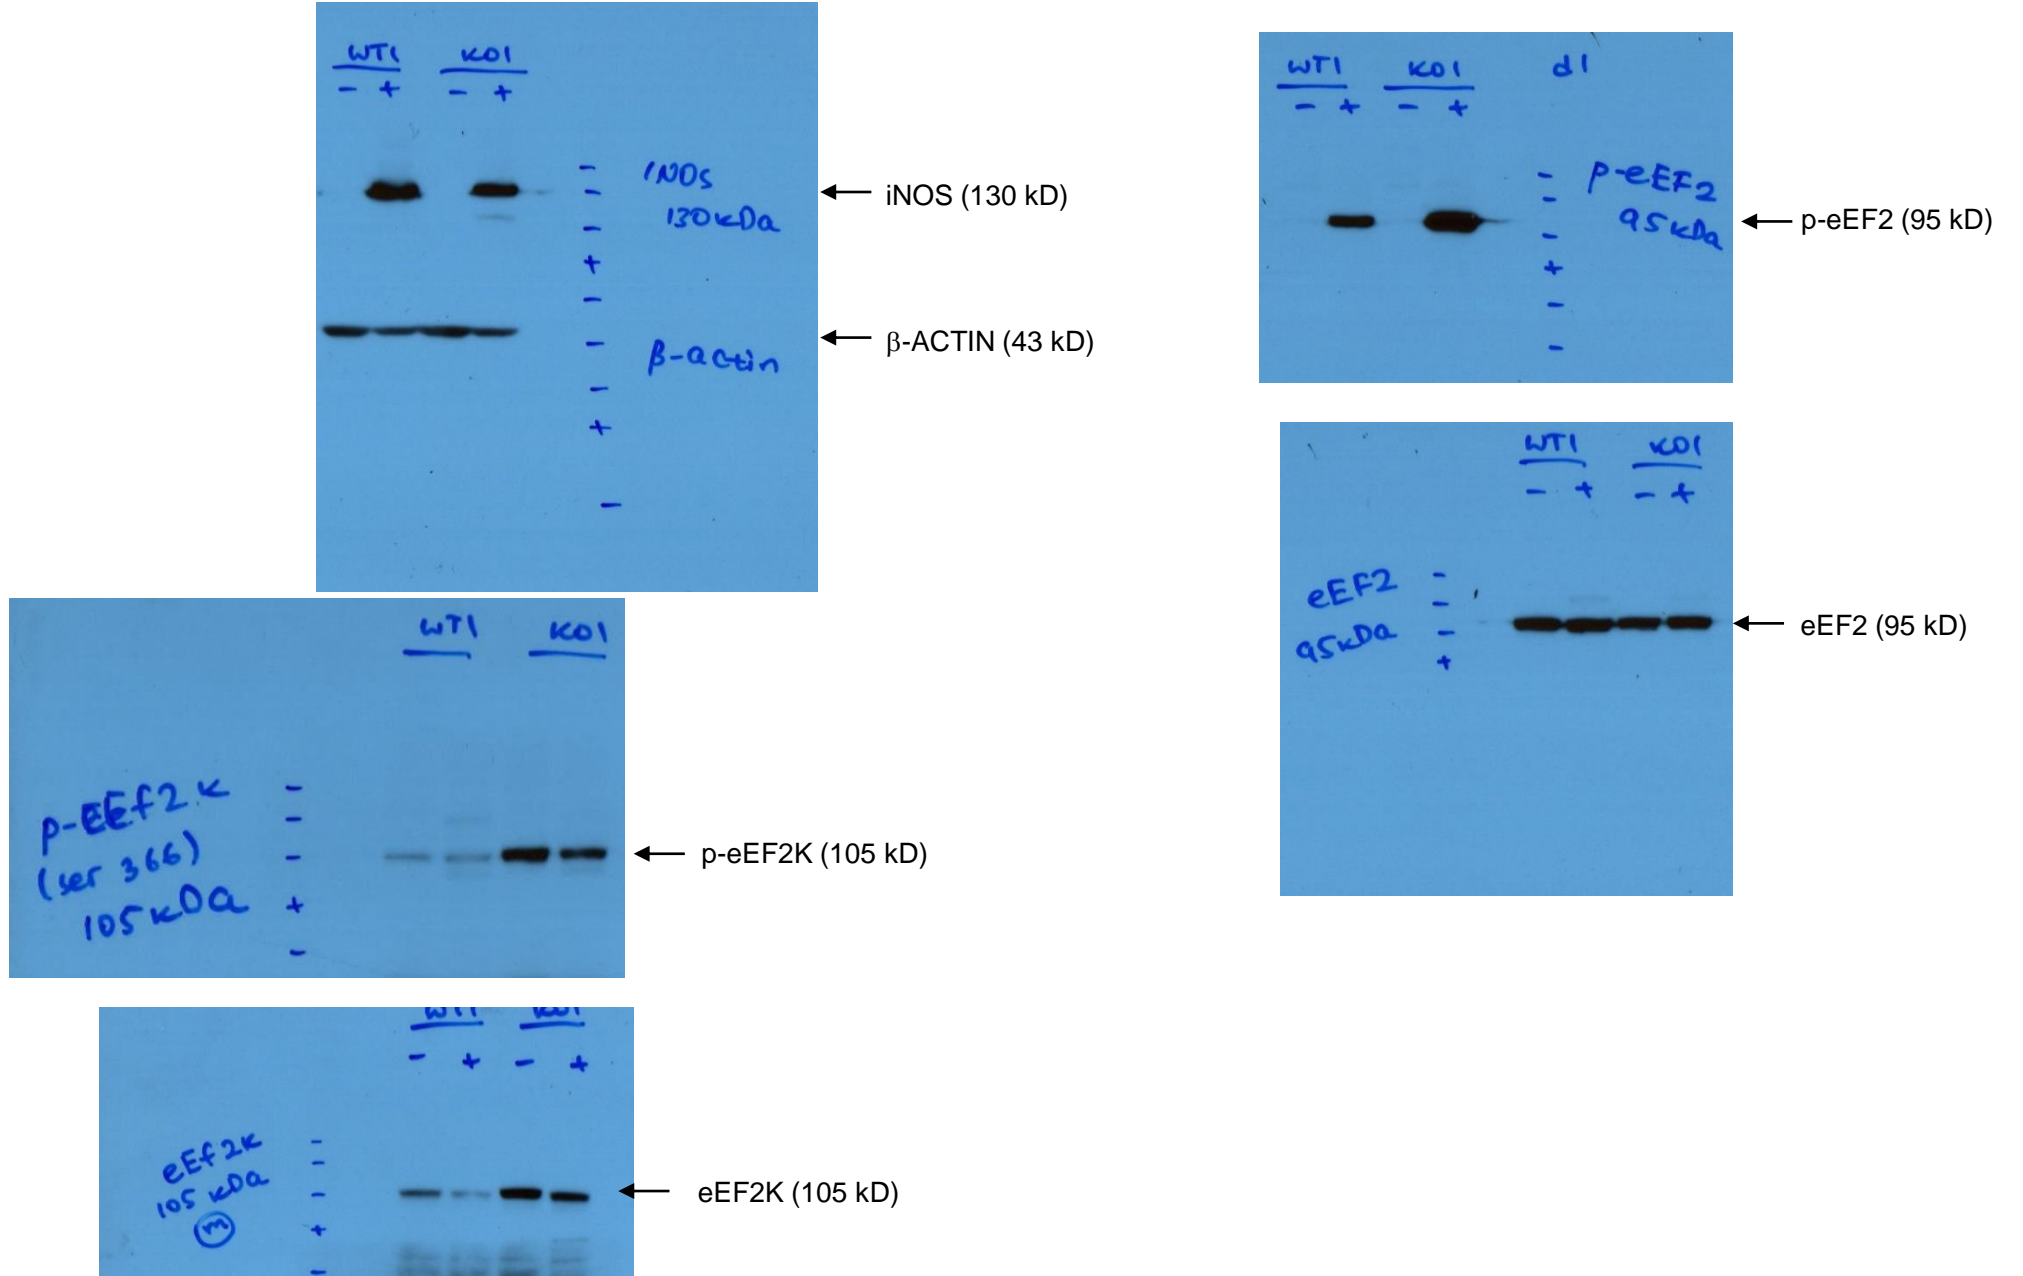



Fig. 5E

Protein marker

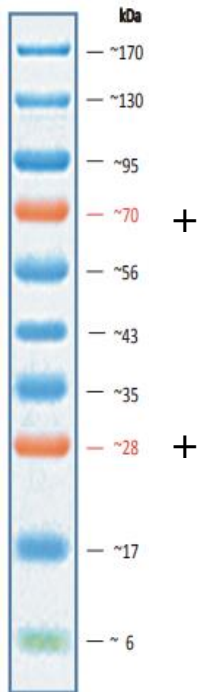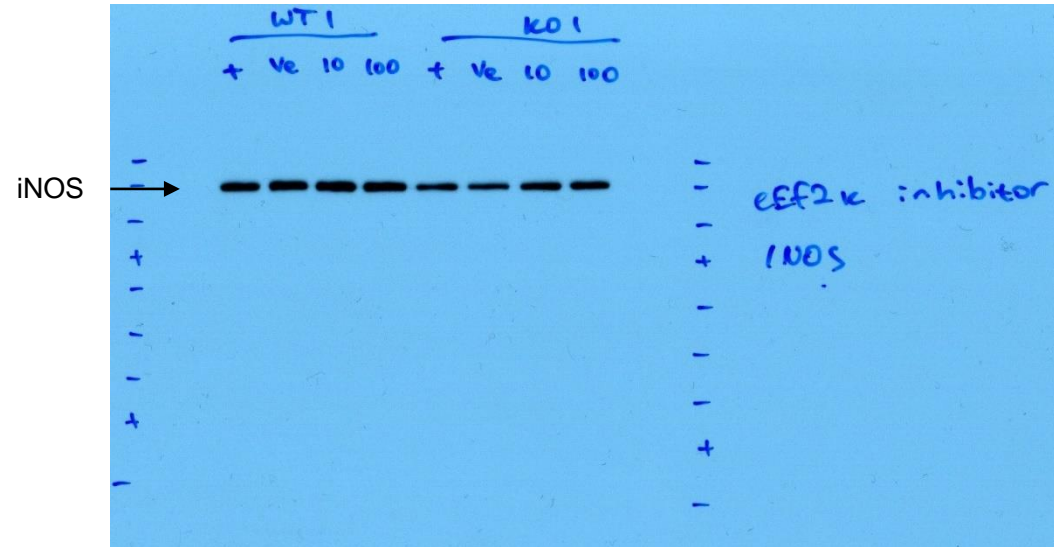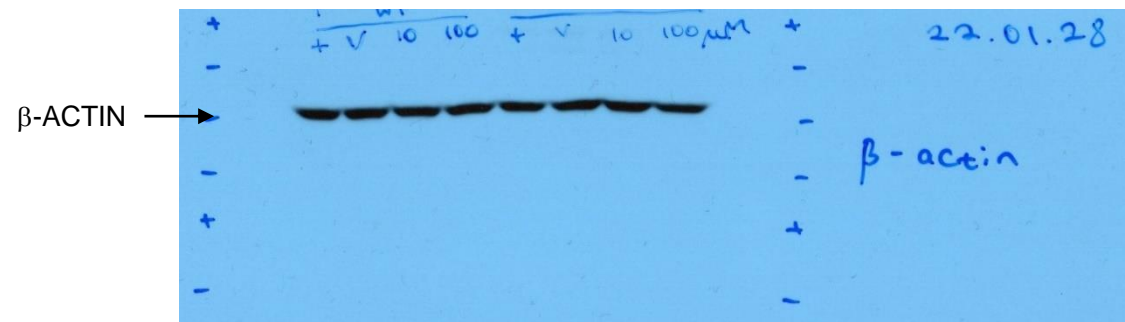

Fig. 6A

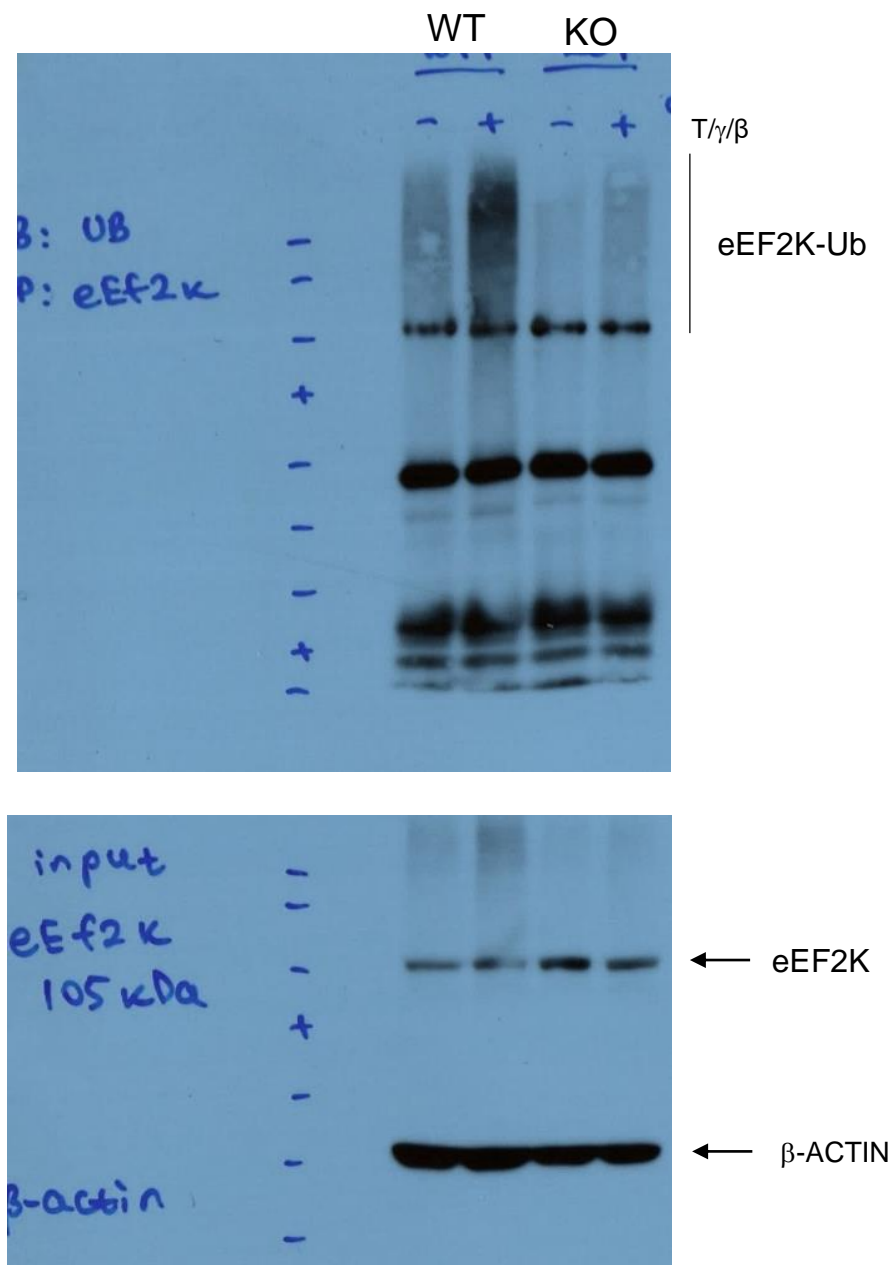

Protein marker

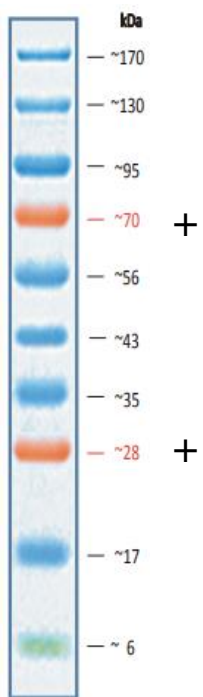

Fig. 6B

Protein marker

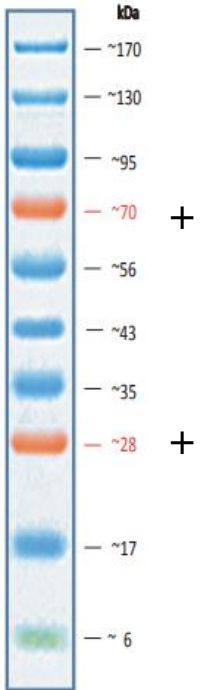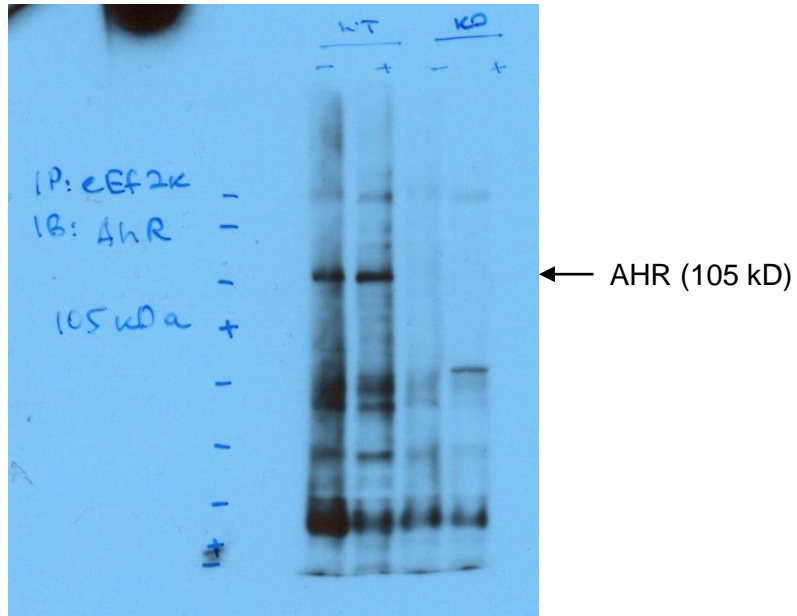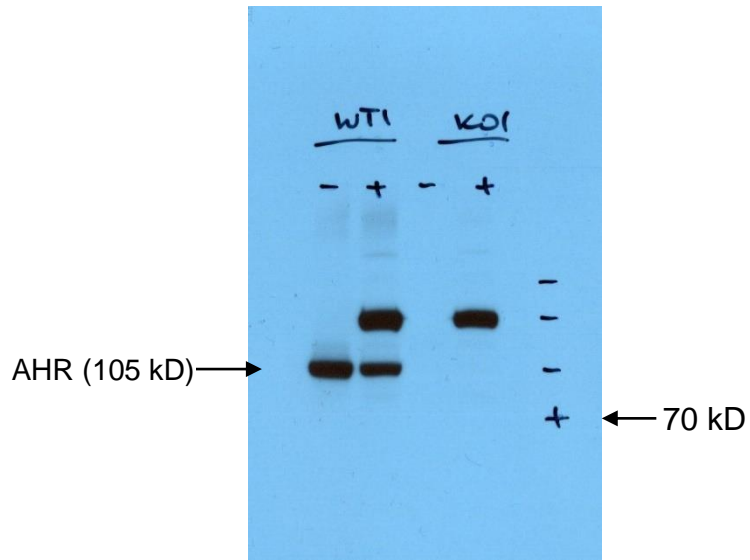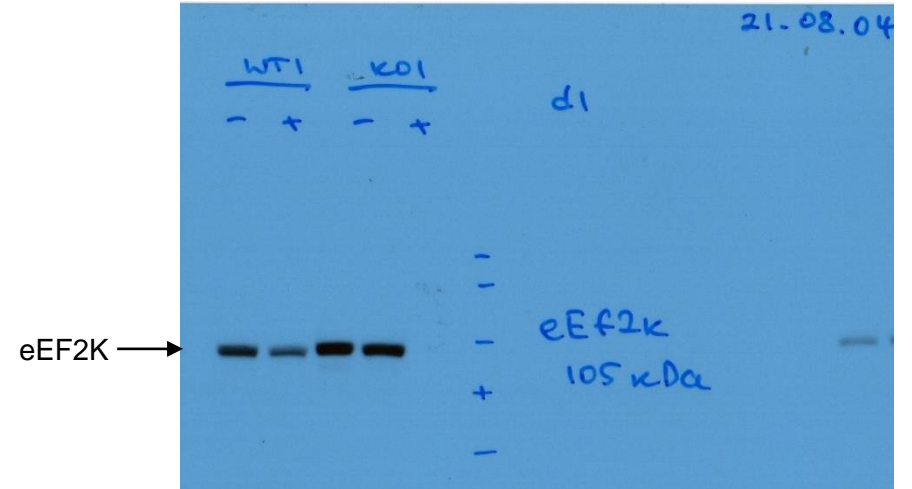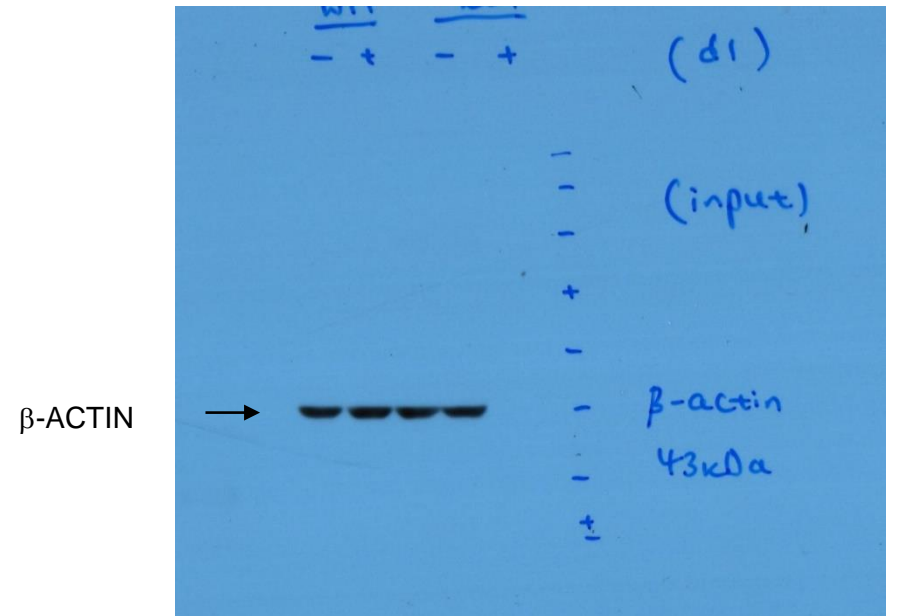

Fig. 6C

Protein marker

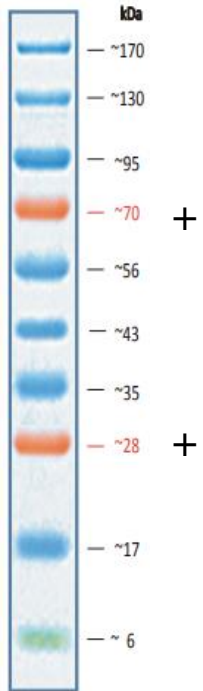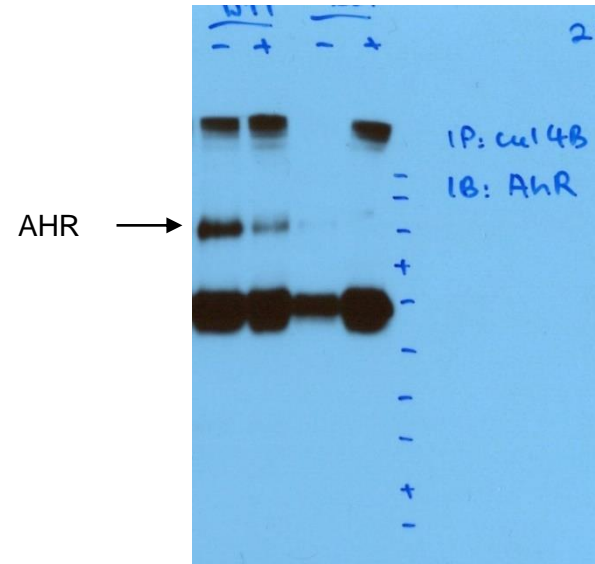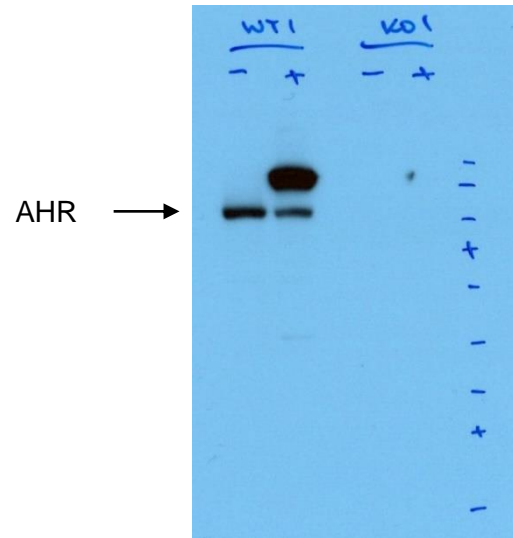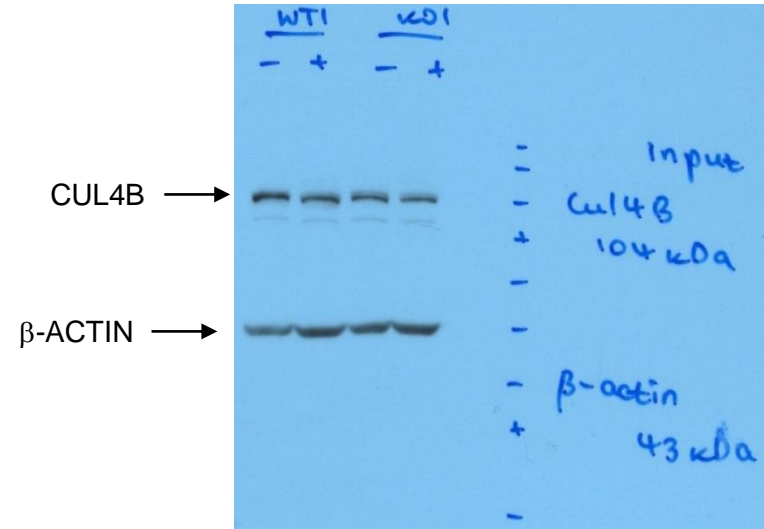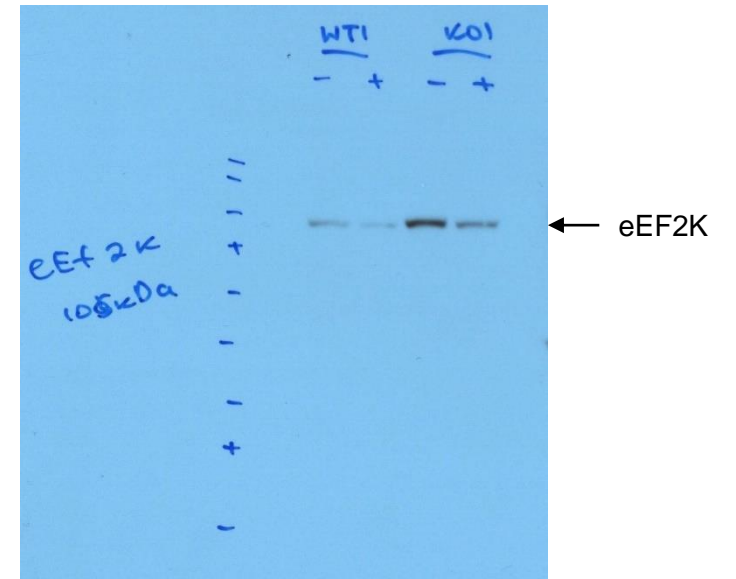

Fig. 6E

Protein marker

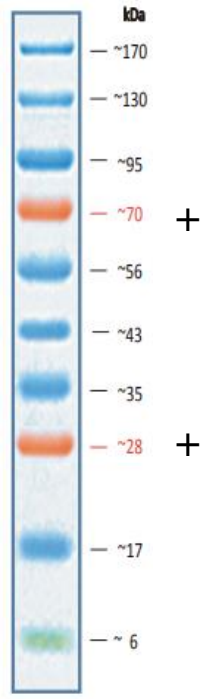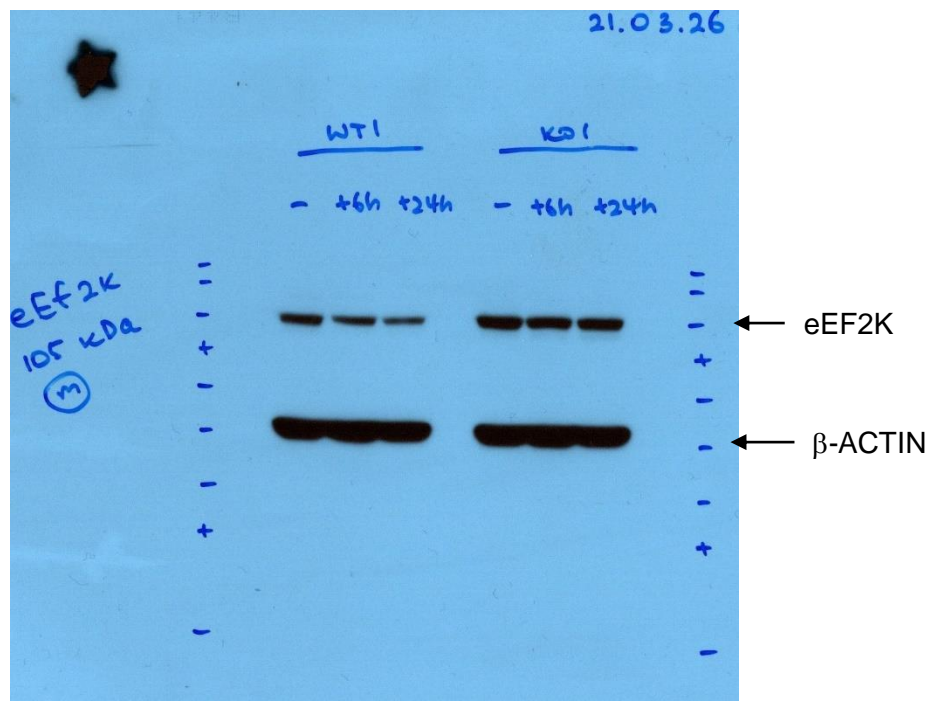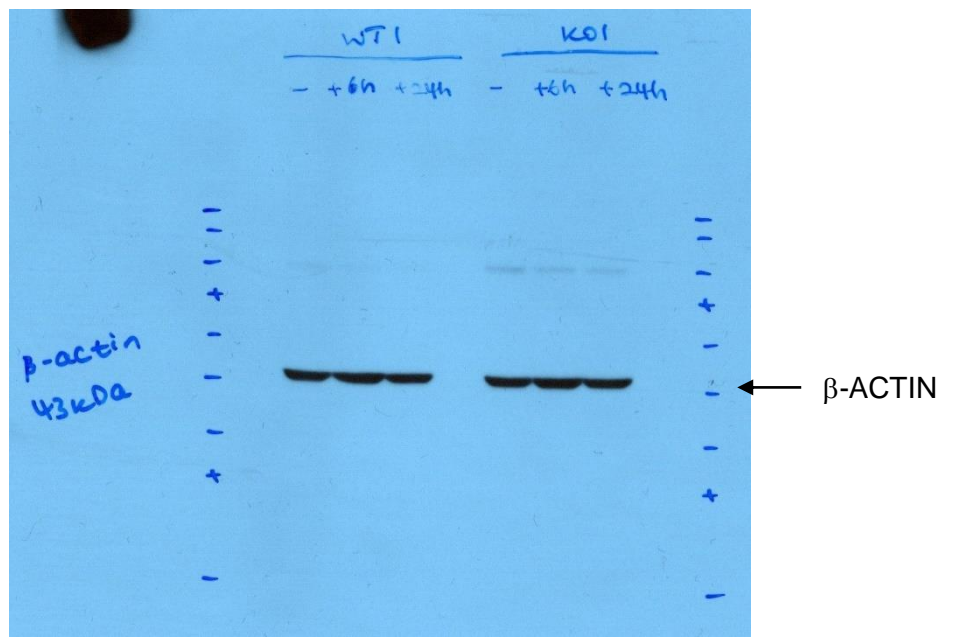

Fig. 7A

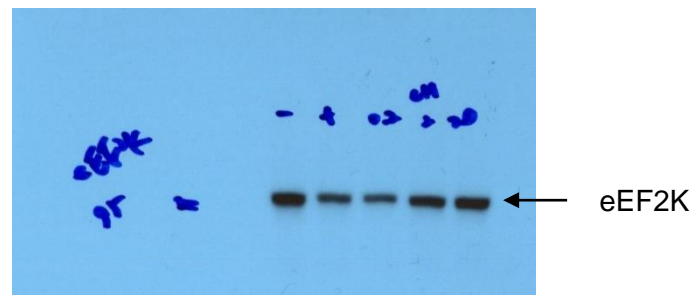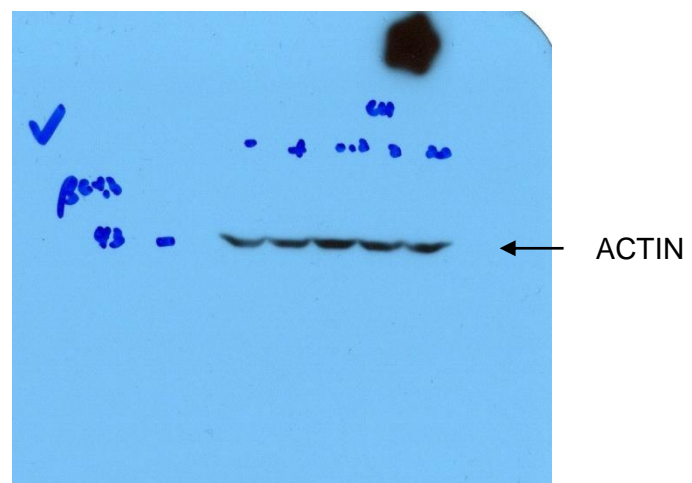

Fig. 7B

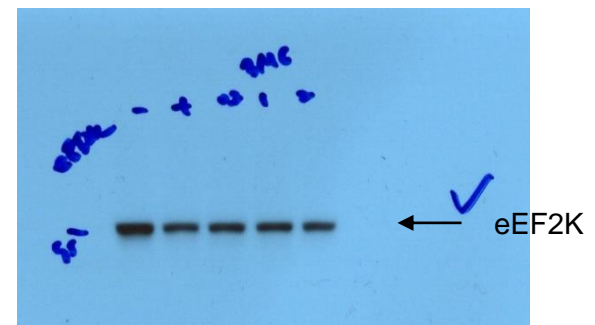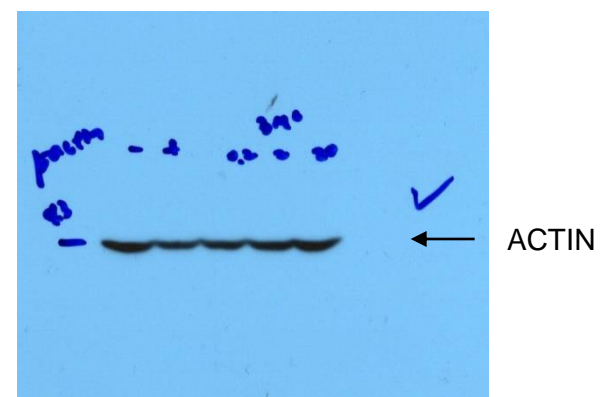

Protein marker

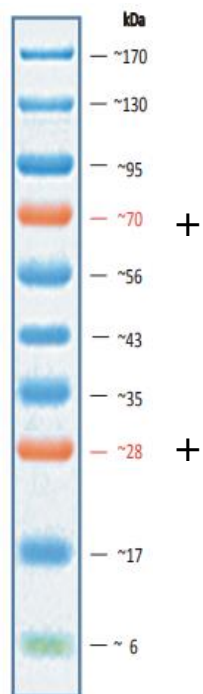

Fig. 7C

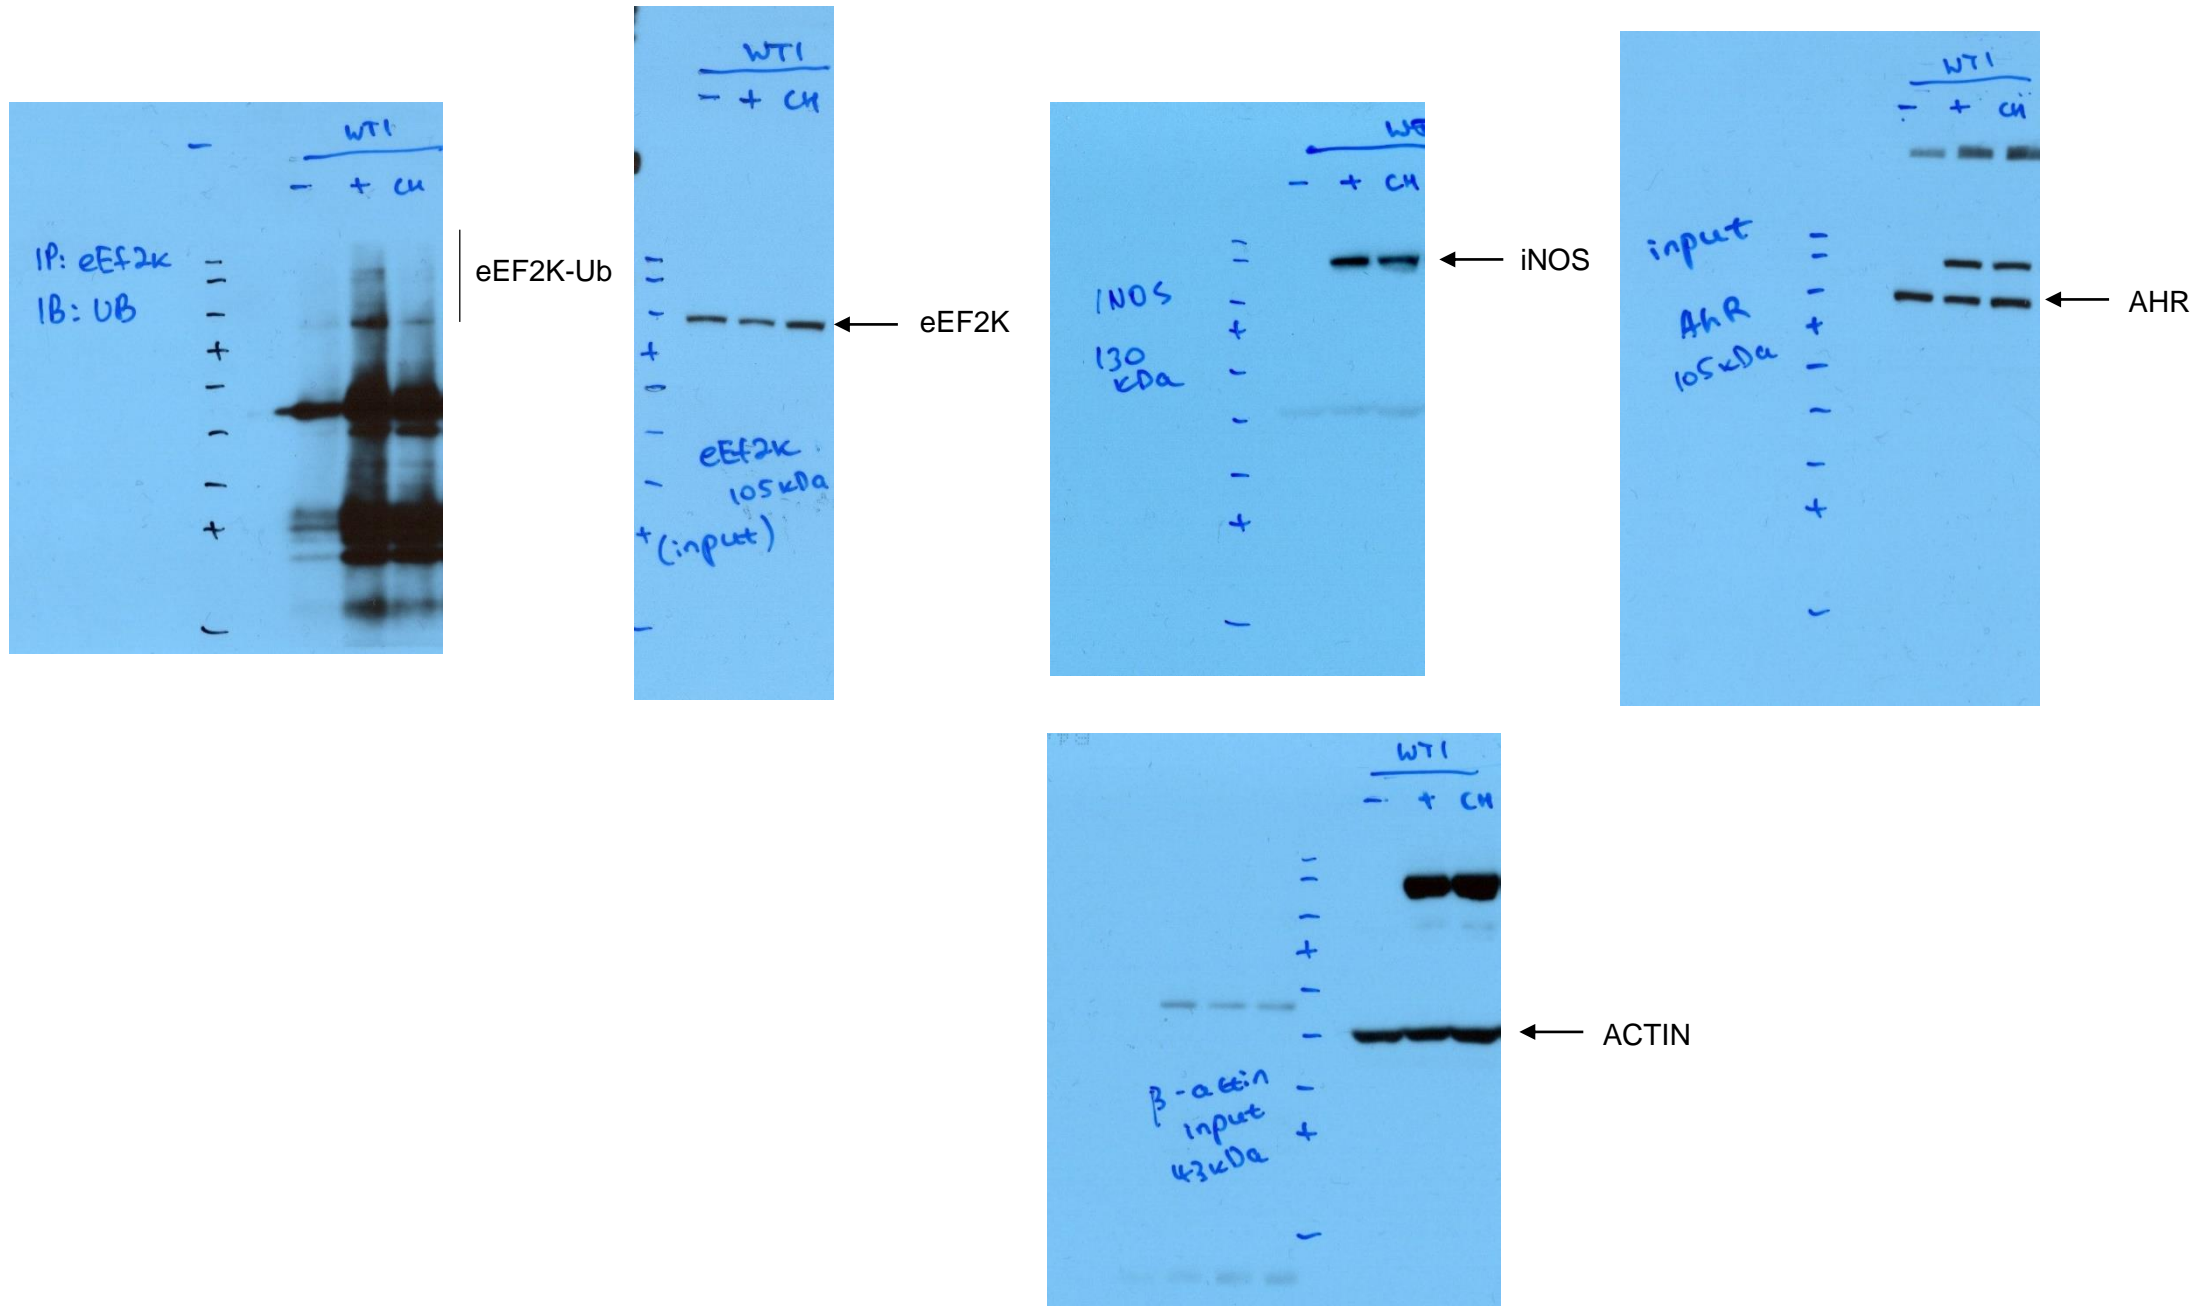

Fig. 7D

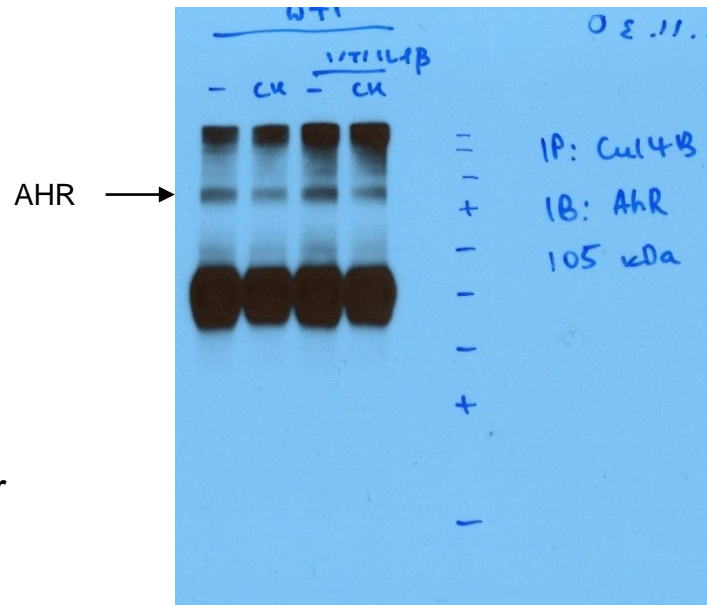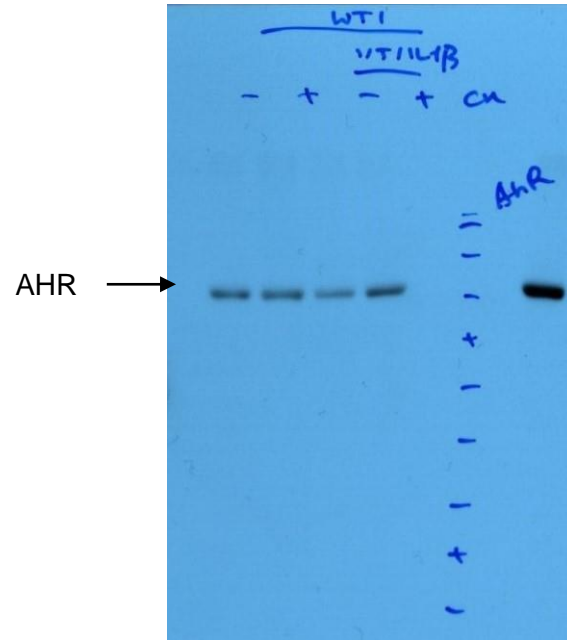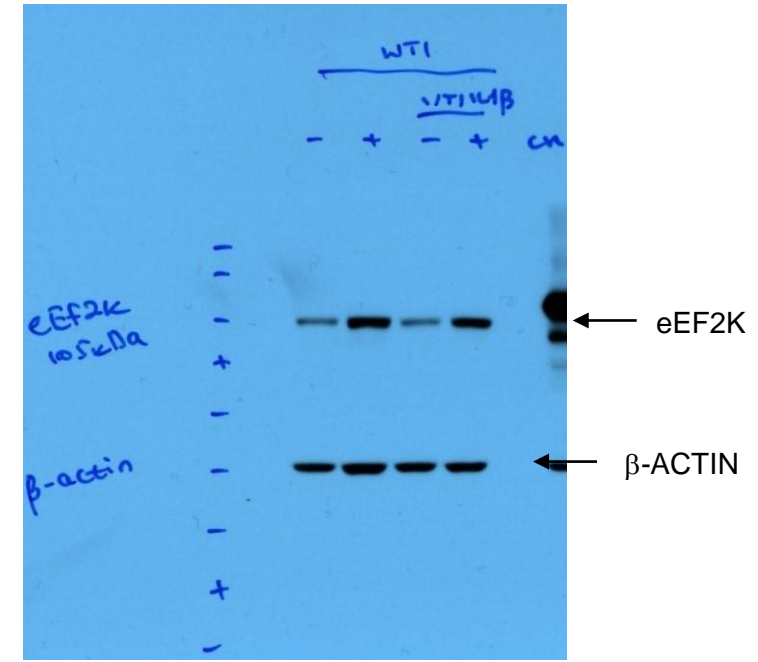

Protein marker

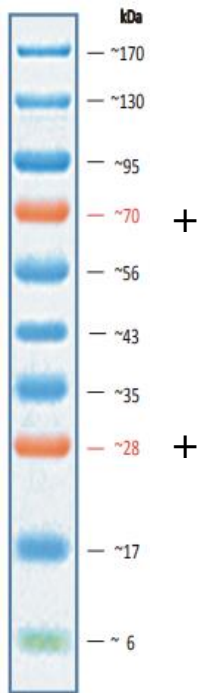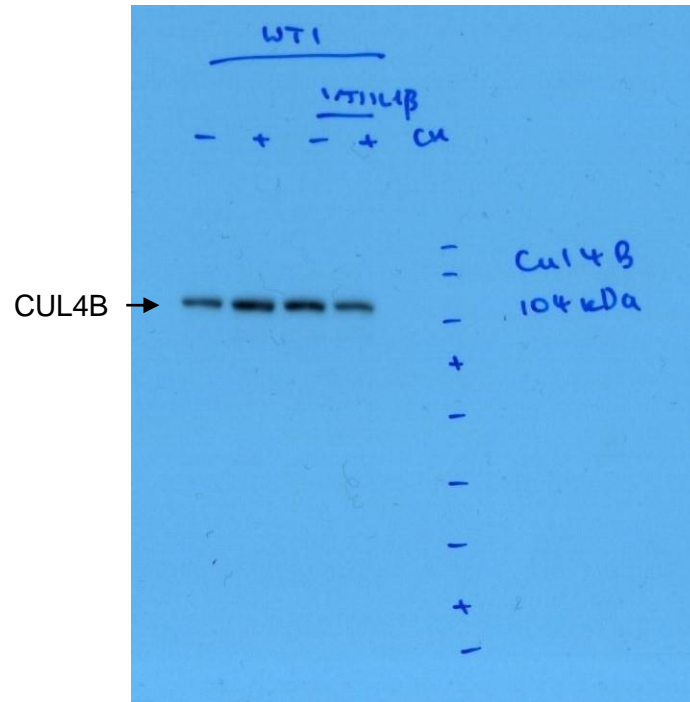



Fig. 7E

Protein marker

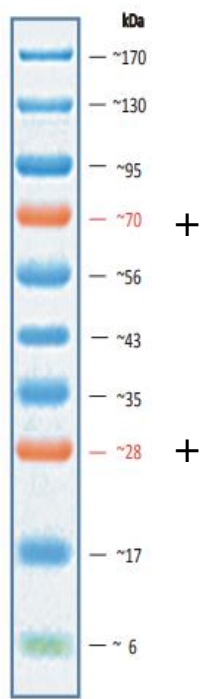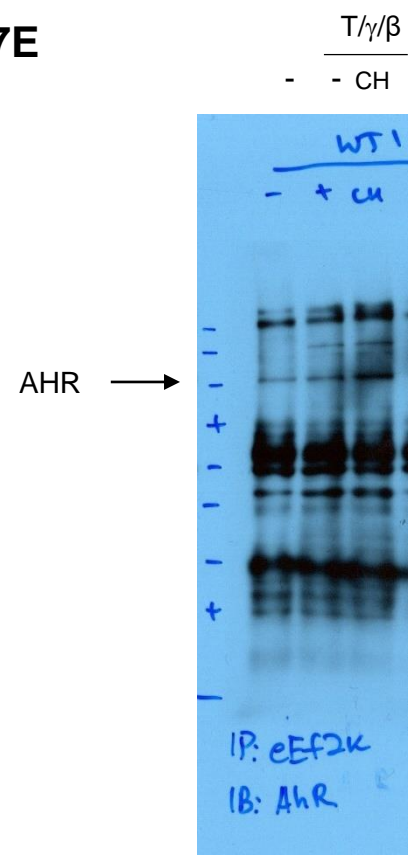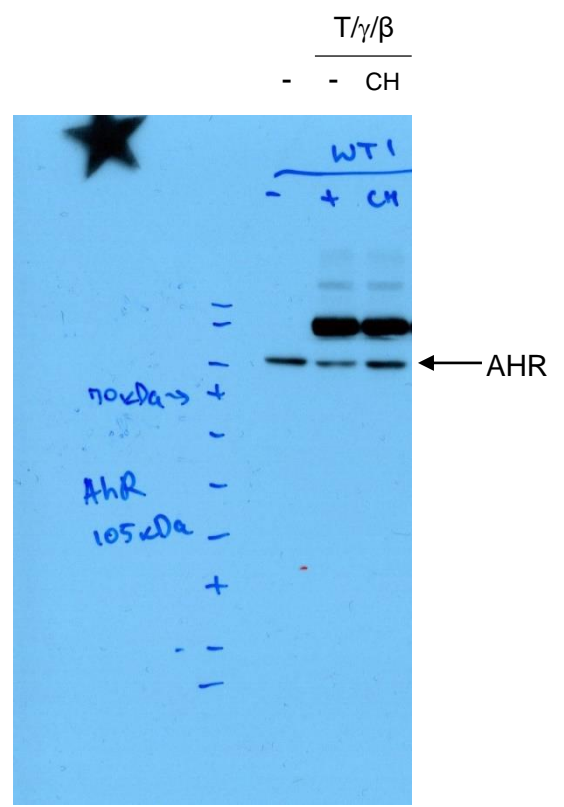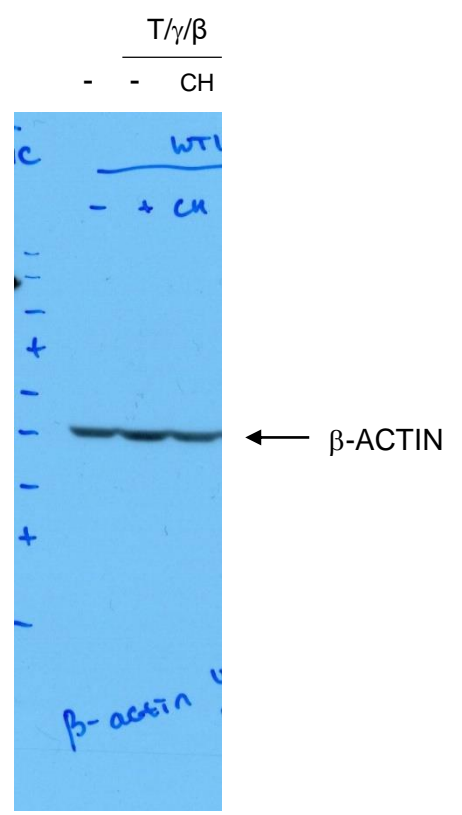

Fig. 8A

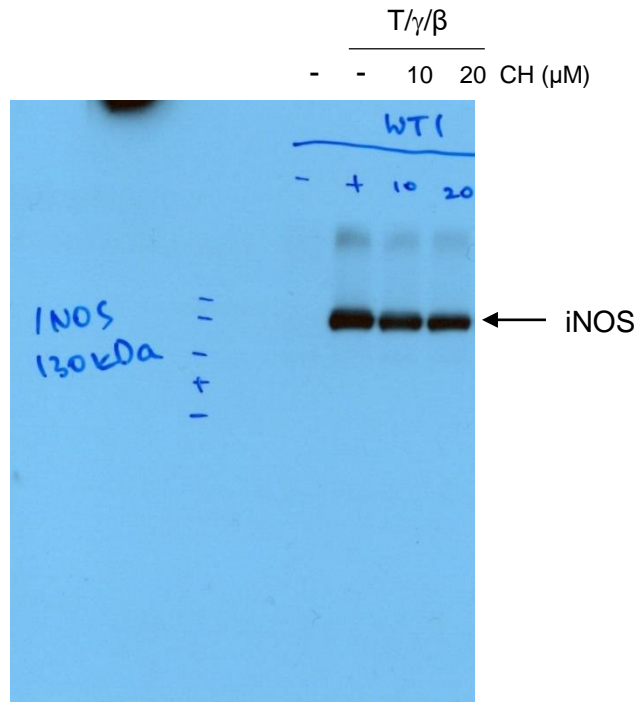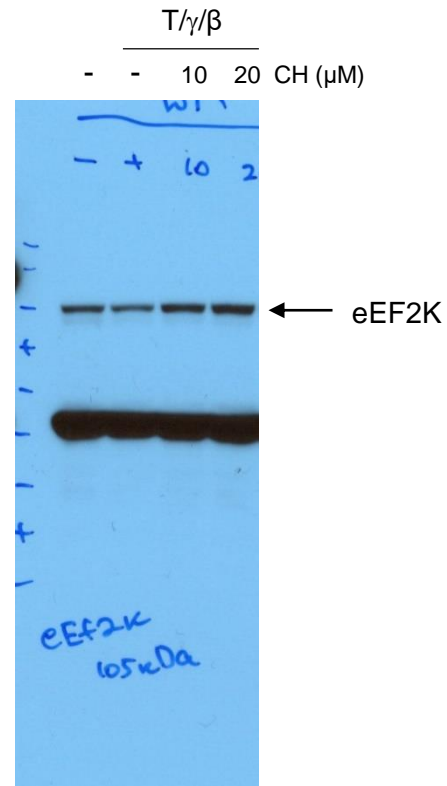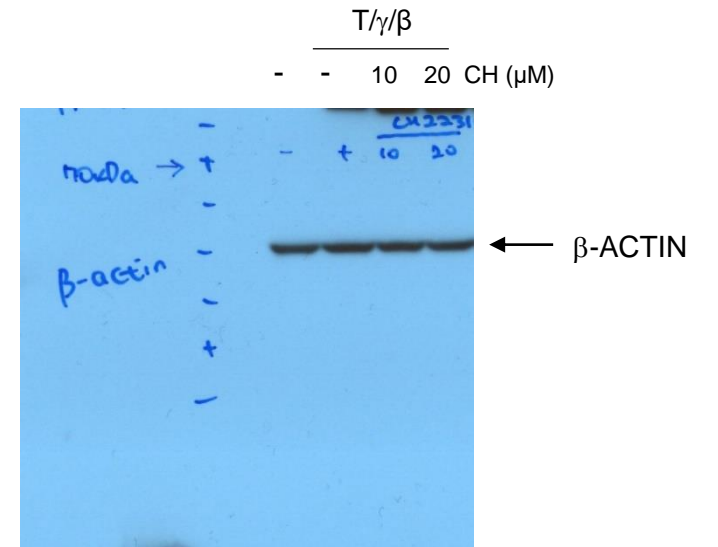

Protein marker



# Supplementary Fig. 2

Protein marker

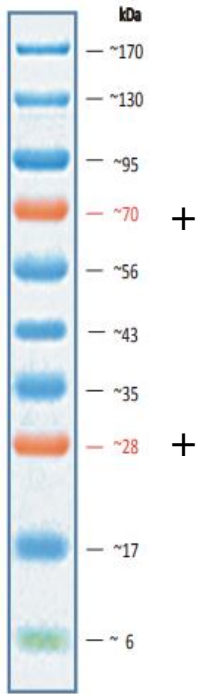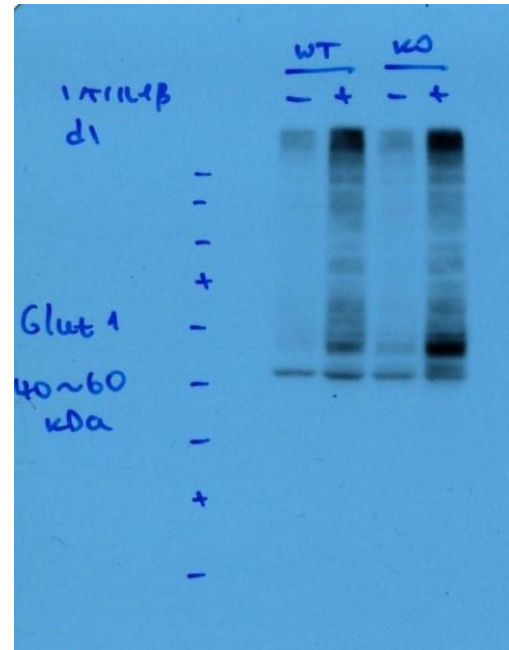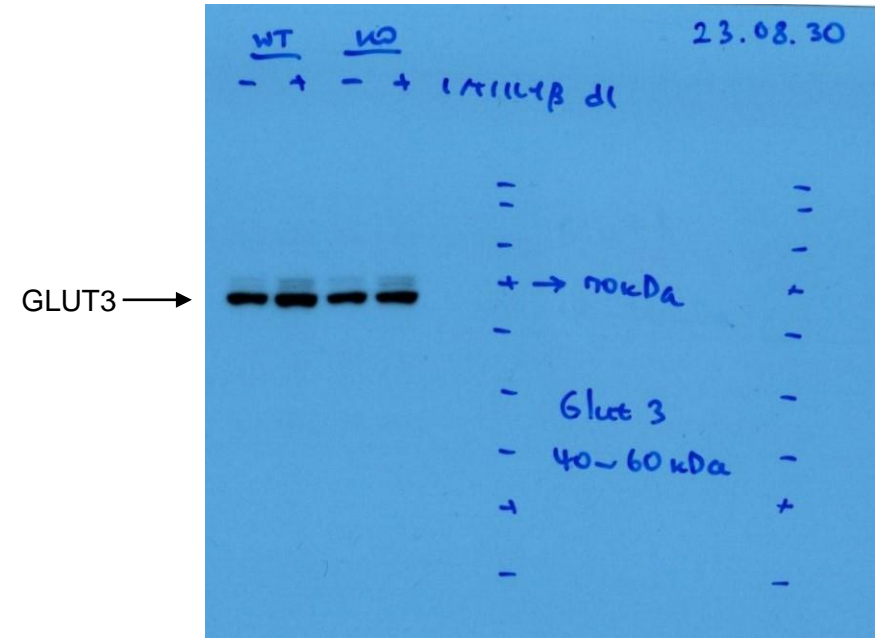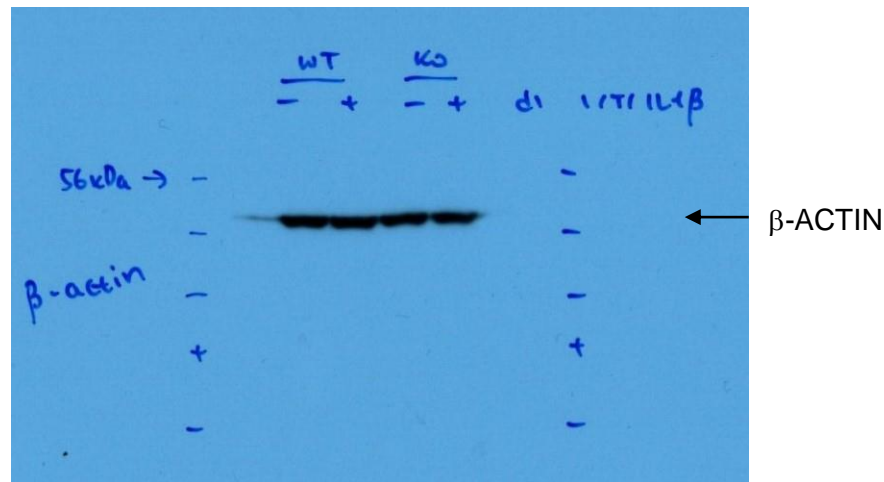

Supplement: 41419_2023_6341_MOESM2_ESM.pdf [file 41419_2023_6341_MOESM2_ESM.pdf]
