# Supplementary material for: The aryl hydrocarbon receptor controls mesenchymal stromal cell-mediated immunomodulation via ubiquitination of eukaryotic elongation factor-2 kinase
Source: PubMed Central journal article supplement (PMC10710493; doi:10.1038/s41419-023-06341-7), 2023-12-09
Supplement: 41419_2023_6341_MOESM1_ESM.pdf [file 41419_2023_6341_MOESM1_ESM.pdf]

**The aryl hydrocarbon receptor controls mesenchymal stromal cell-mediated immunomodulation via ubiquitination of eukaryotic elongation factor-2 kinase**

Enkhmaa Lkhagva-Yondon<sup>1,3,7</sup>, Myeong Seong Seo<sup>1,3,7</sup>, Yena Oh<sup>1,2</sup>, Jong Hun Jung<sup>1,3</sup>, Eunhae Jeon<sup>1,2</sup>, Kwangmin Na<sup>1</sup>, Hyun Seung Yoo<sup>1,2</sup>, Woo Chul Kim<sup>4</sup>, Charlotte Esser<sup>5</sup>, Sun U Song<sup>1,2,6</sup>, and Myung-Shin Jeon<sup>1,2,3,6</sup>

<sup>1</sup> Translational Research Center, Inha University Hospital, Incheon 22332, Republic of Korea

<sup>2</sup> Department of Molecular Biomedicine, College of Medicine Inha University, Incheon 22212, Republic of Korea

<sup>3</sup> Program in Biomedical Science & Engineering Inha University, Incheon 22212, Republic of Korea

<sup>4</sup> Department of Radiation Oncology, Inha University Hospital, Incheon 22332, Republic of Korea

<sup>5</sup> IUF-Leibniz Research Institute for Environmental Medicine, Düsseldorf 40021, Germany

<sup>6</sup> SCM Lifescience, Incheon 21999, Republic of Korea

Correspondence: Prof. Myung-Shin Jeon, Translational Research Center, Inha University Hospital, College of Medicine, B/306 Jungseok Bldg., 366 Seohae-daero, Jung-Gu, Incheon 22332, Korea. (Tel.) +82-32-890-3682; (Fax) +82-32-890-2462; (E-mail) [msjeon@inha.ac.kr](mailto:msjeon@inha.ac.kr)

<sup>7</sup> These authors contributed equally to this work.

## Supplement Figure 1

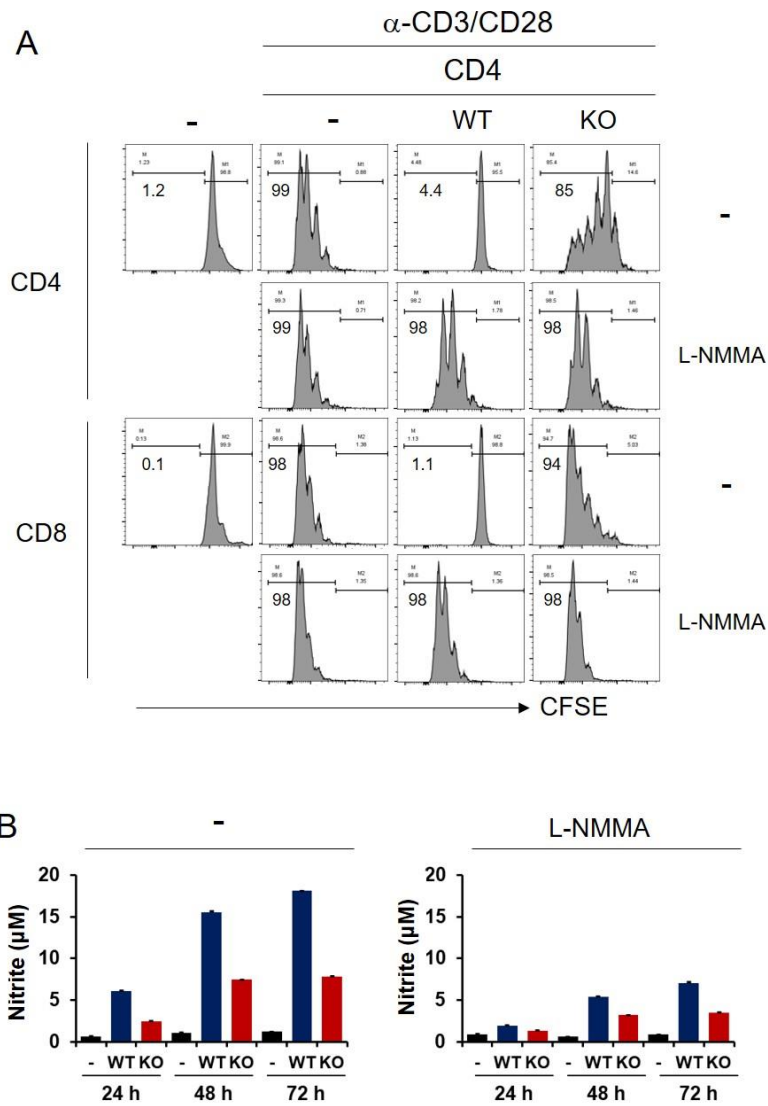

**Fig. 1 Effect of *Ahr*<sup>-/-</sup> MSC on T cell proliferation in the presence of iNOS inhibitor**

Lymphocytes were stained with CFSE and stimulated with 1  $\mu$ g/mL anti-CD3 and anti-CD28 Abs in the presence of 1 mM L-NMMA, an iNOS inhibitor. (A) After 72 h, T-cell divisions were analyzed by flow cytometry. (B) NO production was measured in the culture media using ELISA.

**Supplement Figure 2**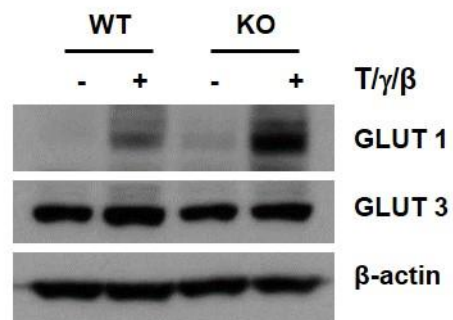**Fig. 2 Effect of *Ahr* deficiency on glucose transporters**

WT- and KO-MSCs were stimulated by TNF- $\alpha$ , IFN- $\gamma$ , and IL-1 $\beta$ . After 24 h, the expression of GLUT1 and GLUT3 proteins was measured by western blotting.

## Supplement Figure 2

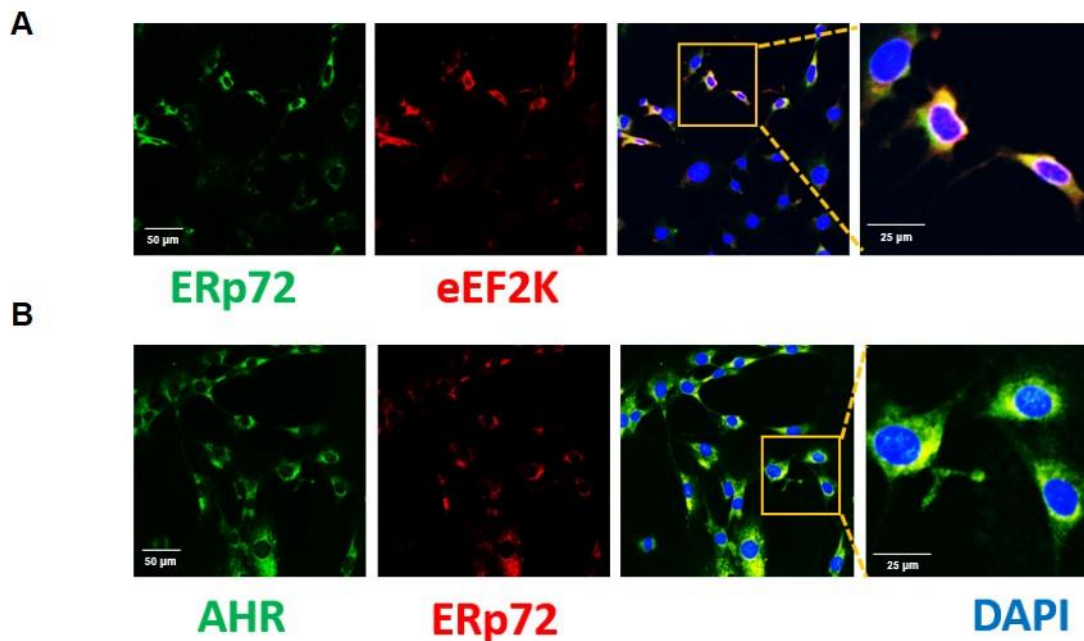

**Fig. 3 Co-localization of AHR and eEF2K with ER marker ERp72**

(A) MSCs were stained with anti-AHR (green) and anti-eEF2K (red) antibodies and co-localization was measured by immunofluorescence. (B) MSCs were stained with anti-AHR (green) and anti-ERp72 (red) antibodies and immunofluorescence measured co-localization. DAPI was used to count nuclear staining. All experiments were repeated at least twice, and similar results were obtained.

## Supplement Figure 4

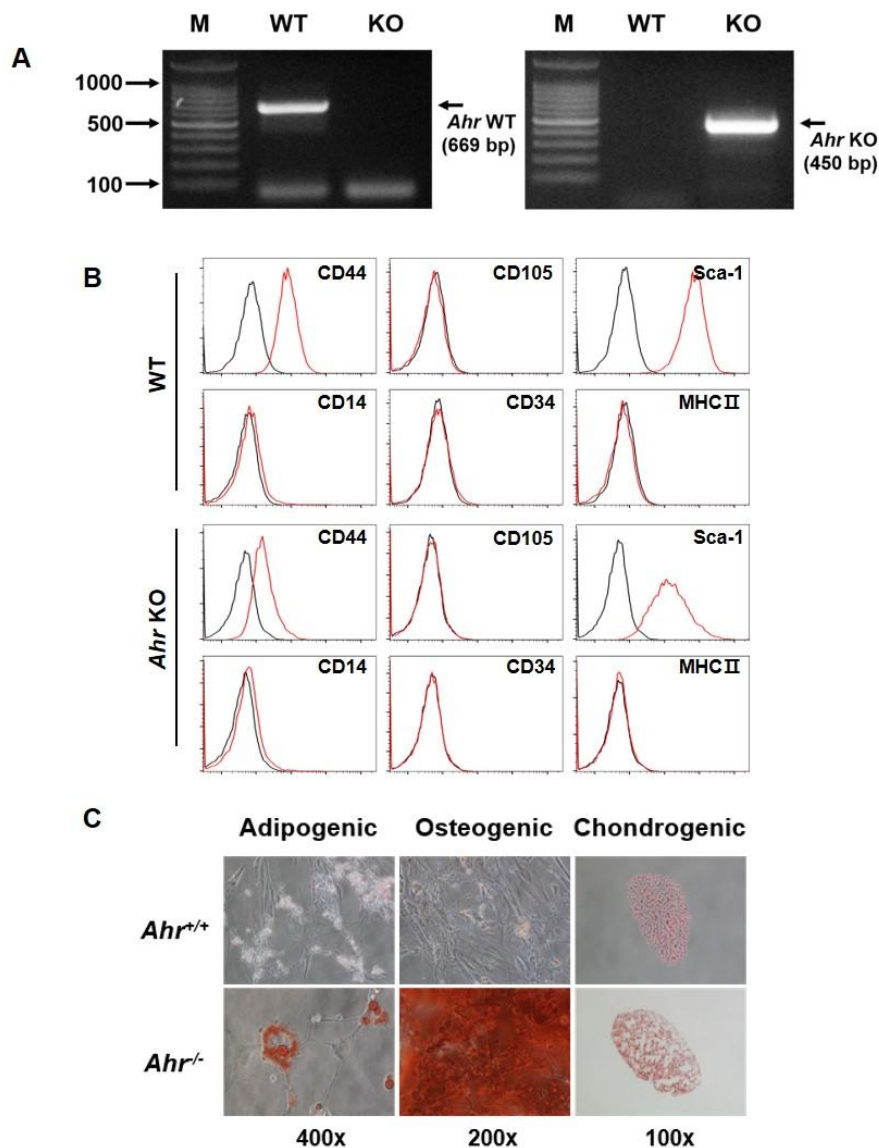**Fig. 4 Genotyping, characterization, and differentiation of MSCs**

(A) Genotyping of *Ahr*. Using phenol extraction, genomic DNA was isolated from *Ahr* wild-type (WT)- and knockout (KO)-MSCs. *Ahr* gene deficiency was confirmed by genomic PCR. (B) MSCs were characterized according to cell surface markers, such as positive for CD44, CD105, and Sca-1 and negative for CD14, CD34, and MHC class II. (C) Three lineage differentiation of MSCs was performed. All experiments were repeated at least twice, and similar results were obtained.

## Supplement Figure 5

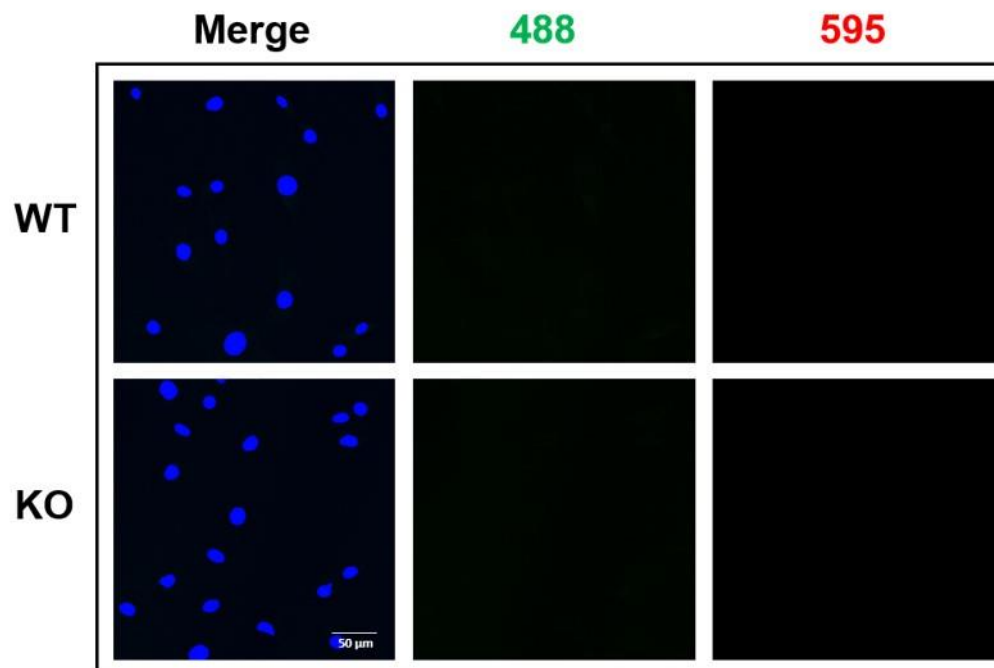**Fig. 5 Immunofluorescence staining control**

2<sup>nd</sup> Antibodies were stained alone as a negative control.

**Supplemental Table 1 Antibodies**

| <b>Antibody</b>  | <b>Source</b>                    | <b>Identifier</b> | <b>Application</b>                |
|------------------|----------------------------------|-------------------|-----------------------------------|
| Actin            | Santa Cruz ( CA, USA)            | #47778            | WB (1/1,000)                      |
| AhR              | Proteintech (Rosemont, IL, USA)  | #17840-I-AP       | WB (1/1,000), IF (1/100)          |
| b-TRCP           | Cell Signaling (Boston, MA, USA) | #11984S           | WB (1/1,000)                      |
| CD14             | BD Biosciences ( NJ, USA)        | #560638           | FC (1/100)                        |
| CD34             | Biologend (CA, USA)              | #128611           | FC (1/100)                        |
| CD44             | BD Biosciences ( NJ, USA)        | #553133           | FC (1/100)                        |
| CD105            | Biologend (CA, USA)              | #120407           | FC (1/100)                        |
| CUL4B            | Proteintech (Rosemont, IL, USA)  | #12916-1-AP       | WB (1/1,000), IP (4 µg)           |
| eEF2             | Cell Signaling (Boston, MA, USA) | #2332S            | WB (1/1,000)                      |
| eEF2k            | Santa Cruz ( CA, USA)            | #390710           | WB (1/500), IP (4 µg), IF (1/100) |
| eIF2a            | Cell Signaling (Boston, MA, USA) | #9722S            | WB (1/1,000)                      |
| ERp72            | Cell Signaling (Boston, MA, USA) | #5033S            | IF 1/100                          |
| GLUT1            | Abcam (Cambridge, UK)            | #115730           | WB (1/1,000)                      |
| GLUT3            | Proteintech (Rosemont, IL, USA)  | #20403-1-AP       | WB (1/1,000)                      |
| INOS             | Cell Signaling (Boston, MA, USA) | #13120            | WB (1/2000), IP (4 µg)            |
| MHC II           | BD Biosciences (NJ, USA)         | #553623           | FC (1/100)                        |
| p-eEF2 (Thr56)   | Cell Signaling (Boston, MA, USA) | #2331S            | WB (1/1,000)                      |
| p-eEF2k (S366)   | Cell Signaling (Boston, MA, USA) | #3691             | WB (1/1,000)                      |
| p-eIF2a (S51)    | Cell Signaling (Boston, MA, USA) | #3597S            | WB (1/1,000)                      |
| STAT1            | Cell Signaling (Boston, MA, USA) | #14944            | WB (1/1,000)                      |
| p-STAT1 (S727)   | Cell Signaling (Boston, MA, USA) | #8826             | WB (1/1,000)                      |
| Ubiquitin        | Santa Cruz ( CA, USA)            | #8017             | WB (1/1,000)                      |
| Mouse IgG1-HRP   | Cell Signaling (Boston, MA, USA) | #7076S            | WB (1/1,0000)                     |
| Rabbit Ig-G1-HRP | Invitrogen (Carlsbad, CA, USA)   | #31460            | WB (1/1,0000)                     |

**Supplemental Table 2. Chemical lists**

| <b>Name</b>                         | <b>Source</b>             | <b>Identifier</b> |
|-------------------------------------|---------------------------|-------------------|
| A-484954                            | Sigma (St Louis, MO, USA) | #324516           |
| Choloroquine diphosphate salt       | Sigma (St Louis, MO, USA) | #C6628            |
| CH-223191                           | Sigma (St Louis, MO, USA) | #C8124            |
| Cycloheximide                       | Sigma (St Louis, MO, USA) | #C7698            |
| 6-formylindolo [3, 2-b] carbazole   | Sigma (St Louis, MO, USA) | #SML1489          |
| L-NMMA                              | Sigma (St Louis, MO, USA) | #53308-83-1       |
| MG132                               | Sigma (St Louis, MO, USA) | #474790           |
| 3-Methylcholanthrene                | Sigma (St Louis, MO, USA) | #442388           |
| <b>Adipogenic differentiation</b>   |                           |                   |
| Dexamethasone                       | Sigma (St Louis, MO, USA) | #D8893            |
| Indomethacin                        | Sigma (St Louis, MO, USA) | #17378            |
| Insulin                             | Sigma (St Louis, MO, USA) | #19278            |
| Isobutylmethylxanthine              | Sigma (St Louis, MO, USA) | #17018            |
| <b>Chondrogenic differentiation</b> |                           |                   |
| Ascorbic acid                       | Sigma (St Louis, MO, USA) | #A4403            |
| Dexamethasone                       | Sigma (St Louis, MO, USA) | #D8893            |
| ITS Premix                          | BD Bioscience             | #354352           |
| L-Proline                           | Sigma (St Louis, MO, USA) | #P5607            |
| TGF- $\beta$ 1                      | R&D Systems               | #240-B            |
| TGF- $\beta$ 3                      | R&D Systems               | #243-B            |
| <b>Osteogenic differentiation</b>   |                           |                   |
| Ascorbic acid                       | Sigma (St Louis, MO, USA) | #A4403            |
| $\beta$ -glycerolphosphate          | Sigma (St Louis, MO, USA) | #G9422            |
| Dexamethasone                       | Sigma (St Louis, MO, USA) | #D8893            |
| dibutyryl cyclin AMP                | Sigma (St Louis, MO, USA) | #D067             |



**Supplemental Table 3. GVHD Clinical scores**

| Symptoms     | Severity scores |      |        |
|--------------|-----------------|------|--------|
|              | normal          | mild | severe |
| Ruffled hair | 0               | 1    | 2      |
| Hunched back | 0               | 1    | 2      |
| Diarrhea     | 0               | 1    | 2      |
| Damaged skin | 0               | 1    | 2      |
| Ascites      | 0               | 1    | 2      |
| Total        |                 |      | 10     |
| Dead         |                 |      | 10     |
